1  
2  
3  
4  
5  
6  
7  
8  
9  
10  
11  
12  
13  
14  
15  
16  
17  
18  
19  
20  
21  
22  
23  
24  
25

Differentiating electrophysiological indices of internal and external performance monitoring:  
Relationship with perfectionism and locus of control

Alexandra M. Muir<sup>¶</sup>, Kaylie A. Carbine<sup>¶</sup>, Jayden Goodwin<sup>1</sup>, Ariana Hedges-Muncy<sup>1</sup>, Tanja Endrass<sup>3</sup>, and Michael J. Larson<sup>1,2</sup>

<sup>1</sup>Department of Psychology, Brigham Young University, Provo, Utah

<sup>2</sup>Neuroscience Center, Brigham Young University, Provo, Utah

<sup>3</sup>Technische Universität Dresden, Dresden, Germany

\* Corresponding Author:

Email: michael\_larson@byu.edu (MJL)

¶ These authors contributed equally to this work.

## 26 **Abstract**

27           The impact of individual differences on performance monitoring and psychopathology is  
28 a question of active debate. Personality traits associated with psychopathology may be related to  
29 poor internal performance monitoring (as measured by the error-related negativity [ERN]) but  
30 intact external performance monitoring (as measured by the reward positivity [RewP]),  
31 suggesting that there are underlying neural differences between internal and external  
32 performance monitoring processes. We tested the relationships between individual difference  
33 measures of perfectionism, locus of control, and ERN, Pe, and RewP component difference  
34 amplitude in a healthy undergraduate sample. A total of 128 participants (69 female,  $M(SD)_{age} =$   
35 20.6(2.0) years) completed two tasks: a modified version of the Eriksen Flanker and a doors  
36 gambling task along with the Frost Multidimensional Perfectionism scale, the Rotter Locus of  
37 Control scale, and the Levenson Multidimensional Locus of Control scale to quantify  
38 perfectionism and locus of control traits, respectively. Linear regressions adjusting for age and  
39 gender showed that neither  $\Delta$ ERN nor  $\Delta$ RewP amplitude were significantly moderated by  
40 perfectionism or locus of control scores. Findings suggest that, in psychiatrically-healthy  
41 individuals, there is not a strong link between perfectionism, locus of control, and ERN or RewP  
42 amplitude. Future research on individual difference measures in people with psychopathology  
43 may provide further insight into how these personality traits affect performance monitoring.

44

45

46

47

48

## 49 **Introduction**

50 Performance monitoring is the ability to assess task execution and make corresponding  
51 judgments and alterations to improve results (1). Age (2), social context (3), personality (4),  
52 anxiety levels (5), and working memory span (6) are some of the many factors that play a role in  
53 the efficiency of performance monitoring. A growing consensus indicates that some individual  
54 difference traits, such as anxious apprehension, are also consistently associated with increased  
55 neural indices of performance monitoring (7). The role of similar individual difference traits,  
56 such as perfectionistic tendencies and locus of control, are less understood.

57 A method to examine neural reflections of performance monitoring is analysis of event-  
58 related potential (ERP) components (8). The error-related negativity (ERN) is a negative-going  
59 deflection in the ERP waveform thought to originate from the anterior cingulate cortex (ACC)  
60 that occurs between 50 and 100ms after an incorrect response is made (9–13). Although there are  
61 many theories concerning the functional significance of the ERN, the current consensus is that  
62 the ERN represents a monitoring function of cognition or emotional responses associated with  
63 performance accuracy and subsequent behavioral adaptation (11,14–17)

64 Another ERP component where individual differences, such as levels of anhedonic  
65 depression, are implicated is the reward positivity (RewP; (18)). The RewP is a positive going  
66 waveform in response to feedback that occurs approximately 200 to 300 milliseconds after a  
67 favorable outcome or positive feedback is presented (17). When positive feedback is absent (or  
68 negative feedback is present), there is a negative deflection in the waveform (previously referred  
69 to as the feedback negativity [FN]; (17)). Throughout the current paper, many of the manuscripts  
70 cited originally investigated the FN. However, due to studies separating the reward-related  
71 positivity from the absence of reward that appeared as a negativity, we will refer to this

72 component as the RewP (17). The RewP increases in amplitude as increasingly positive pictures  
73 or rewards are presented to participants (19), changes with the presentation of reward-salient  
74 stimuli (20,21), and may serve as a reward prediction error signal indicating the need for future  
75 behavior adjustment to obtain desired feedback (20).

76 Clinical relevance of the ERN and RewP in relation to performance monitoring are seen  
77 in multiple studies of individuals with psychopathology. Individuals diagnosed with  
78 psychopathology tend to show altered ERN amplitudes when compared to psychiatrically-  
79 healthy controls. For instance, there is evidence that people with schizophrenia and autism  
80 spectrum disorders (ASD) manifest a smaller ERN amplitude when compared to healthy controls  
81 (22–28). However, recent research indicates that there are non-significant differences in RewP  
82 amplitude between those with ASD or schizophrenia and psychiatrically-healthy controls (29–  
83 32). The decrease in ERN amplitude but lack of difference between psychopathology groups in  
84 RewP amplitude suggests that individuals with ASD or schizophrenia may have deficits in  
85 internal performance monitoring, but not in their ability to use more concrete external feedback  
86 to monitor and adjust their performance (30,33), although this finding has not always been  
87 consistent in schizophrenia research (34).

88 Given the findings of differential ERN and RewP amplitude, the ERN and RewP ERP  
89 components may be useful in distinguishing if there are specific performance monitoring deficits  
90 that occur in individuals with psychopathology. Such a distinction would be significant for  
91 treatment aimed to help individuals learn from their mistakes and appropriately adapt their  
92 behavior. It would also be beneficial to know what certain aspects of a psychopathology, such as  
93 associated character traits, are related to the discrepancies seen between internal and external  
94 performance monitoring. As such, we sought to test the relationship between ERN and RewP

95 amplitude in relation to various personality traits in a psychiatrically-healthy sample in order to  
96 determine what characteristics might be related to the observed differences between internal and  
97 external performance monitoring and may be subsequently useful to focus on in a clinical  
98 population.

99         One personality trait that is often implicated in psychopathology and may affect  
100 performance monitoring and related ERP components is perfectionism. Perfectionism includes  
101 the pursuit of unrealistic standards of performance and the intolerance of mistakes when trying to  
102 reach said standards (35). Because expectations of performance are so high, perceived failures  
103 are common and are viewed as personal deficiencies (36). Specifically, in maladaptive  
104 perfectionism, individuals tend to set unreachably high-performance expectations and often  
105 participate in maladaptive self-criticism, which can be neurotic and harmful to the individual  
106 (37–39). As such, maladaptive perfectionism is a common underlying factor in several  
107 psychiatric disorders, including obsessive-compulsive disorder (OCD), obsessive-compulsive  
108 personality disorder (OCPD), eating disorders, and anxiety disorders (40,40–43).

109         The neural correlates of high perfectionistic tendencies are poorly understood. Recent  
110 work suggests perfectionism is associated with increases in performance monitoring—including  
111 the processing of errors (44,45). Traits included in the general term of perfectionism, such as  
112 holding extremely high personal standards, fear of negative evaluation, and doubts over actions,  
113 are also associated with enhanced ERN amplitudes (45,46). In addition to these previous  
114 findings, people with maladaptive perfectionism tend to larger (i.e., most negative) ERN  
115 amplitude relative to individuals with adaptive perfectionism and people without perfectionistic  
116 tendencies (44), suggesting that perfectionism plays a role in performance monitoring as indexed  
117 by the ERN.

118 In individuals with anxiety, a disorder with characteristically high levels of maladaptive  
119 perfectionism (47), RewP amplitude is blunted which may be indicative of impaired sensitivity  
120 to external cues (48). However, to our knowledge, there are currently no studies that have  
121 examined perfectionism and its relationship to the RewP directly, nor in contrast with ERN  
122 amplitude in the same sample. Taken together, perfectionism may heighten internal assessment  
123 of behavior (as quantified by the ERN) but may dampen or not strongly affect external  
124 performance monitoring (as measured by the RewP). The first aim of our study, therefore, was to  
125 test the relationship between perfectionistic traits and internal and external indices of  
126 performance and reward monitoring as indexed by the ERN and RewP components.

127 Another personality trait that is often implicated in psychopathology and may be  
128 associated with performance monitoring ERP components is locus of control. Locus of control is  
129 defined as one's perceived control over his or her environment and situation (49). Those with a  
130 more internal locus of control believe they have greater control over their environment and  
131 therefore can influence it, while those with a more external locus of control believe they have  
132 little control over their situations and instead the environment influences them. Locus of control  
133 and perfectionism are theorized to be related, as those with high perfectionistic standards feel a  
134 lack of control over the outcomes of their actions (i.e., they feel they will "never" succeed) much  
135 like individuals with an external locus of control (50). Therefore, it has been suggested that  
136 external locus of control moderates the apparent relationship between perfectionistic tendencies  
137 and certain psychopathologies, such as post-partum depression (50). In relation to performance  
138 monitoring, internal versus external locus of control may influence how an individual perceives  
139 errors because it may change our view as to what or whom is responsible for said errors.  
140 Currently, there are no studies that have tested how internal and external locus of control relates

141 to performance monitoring (ERN) and reward-related (RewP) amplitudes. The second aim of  
142 this study is to test the possible relationship of locus of control as a personality characteristic that  
143 is differentially related to the ERN or RewP.

144 The error positivity or post-error positivity (Pe) is another prominent ERP component  
145 that reflects internal performance monitoring. The Pe is a posterior, positive going peak in the  
146 ERP waveform that appears approximately 200 to 400 ms after an erroneous response. The Pe is  
147 thought to reflect conscious awareness of error commission (51), as the Pe is much more  
148 prominent for conscious errors versus unconscious errors (52). Pe amplitudes are also positively  
149 correlated with perfectionistic characteristics, such as high personal standards or high evaluative  
150 concerns, but these findings have not always been consistent (45,53). Other studies have shown  
151 that blunted Pe amplitudes are related to higher levels of perfectionism (54), again suggesting  
152 mixed results when examining the Pe and perfectionism. Due to the wide variety of sample sizes  
153 in research to date (n=43 (53); n=94 (45); n=17 (54)) larger-scale studies across a range of  
154 perfectionistic tendencies are needed in order to further understand the relationship between  
155 perfectionism and the Pe.

156 Given that personality traits, such as perfectionism and locus of control, may moderate  
157 ERN, RewP, and Pe amplitudes, we aimed to study the relationship between perfectionism, locus  
158 of control, and these ERP components. For our primary pre-registered analyses, we used  
159 difference amplitudes (error minus correct [ERN and Pe] or reward minus loss [RewP]) in order  
160 to isolate the specific error- and reward-related activity, rather than using the less-specific ERN  
161 or RewP components in isolation. As secondary, exploratory, analyses we used a residualized  
162 difference score to account for possible poor reliability associated with subtraction difference  
163 scores (55–57). We first hypothesized that individuals with increased perfectionistic tendencies

164 would exhibit a greater ERN difference amplitude ( $\Delta$ ERN) and a smaller RewP difference  
165 amplitude ( $\Delta$ RewP) compared to those with lower perfectionistic tendencies due to enhanced  
166 internal performance monitoring. Second, we hypothesized that those with a more internal locus  
167 of control would exhibit larger  $\Delta$ ERN and smaller  $\Delta$ RewP when compared to those with a more  
168 external locus of control due to enhanced internal performance monitoring. Although the primary  
169 goal of the present study was to differentiate between the processes of the ERN and RewP, the  
170  $\Delta$ Pe was also examined in an exploratory manner as another neural indicator of internal  
171 performance monitoring. We hypothesized a heightened  $\Delta$ Pe would be related to increased  
172 perfectionism levels and a more internal locus of control.

## 173 **Materials and method**

174 All data, code used for data analyses, and supplementary materials have been posted to  
175 the Open Science Framework (OSF) and can be found at this link: <https://osf.io/8pkzu/>.

## 176 **Participants and Procedures**

177 Procedures were approved by the local Institutional Review Board. The original sample  
178 included 181 individuals recruited from undergraduate courses and given course credit for  
179 participation. Exclusion criteria were determined *via* self-report and included: being outside the  
180 ages of 18 and 55 years, left-handedness, neurological disease, psychiatric disorders, learning  
181 disability, or head injury that resulted in loss of consciousness. One participant was excluded  
182 from data analysis due to age, and three were excluded due to incomplete questionnaire data. For  
183  $\Delta$ ERN analyses, five additional participants were excluded due to computer malfunction during  
184 data collection and 31 participants were excluded for not having enough trials to produce a  
185 reliable signal (see Electroencephalogram Recording and Reduction section below).



186 Additionally, 13 participants were excluded for having less than 50% accuracy on either  
187 incongruent or congruent trial types in the flanker task. The final sample for the  $\Delta$ ERN and  $\Delta$ Pe  
188 analyses included 128 individuals (69 female,  $M_{\text{age}} = 20.6$  years,  $SD_{\text{age}} = 2.0$  years). For the  
189  $\Delta$ RewP analyses, eight participants were excluded due to computer malfunction during data  
190 collection. Eighteen participants were excluded for not completing the doors task, as it was  
191 introduced after the initial experiment had begun, and 32 participants were excluded for not  
192 having enough trials to produce a reliable signal (see Electroencephalogram Recording and  
193 Reduction). The final sample for the  $\Delta$ RewP analyses included 119 undergraduates (65 female,  
194  $M_{\text{age}} = 20.5$  years,  $SD_{\text{age}} = 2.0$  years).

195 Participants reported for a single laboratory session where written informed consent was  
196 first obtained and then a standard demographic questionnaire administered. Subsequently, the  
197 following questionnaires were administered in the following order: Beck Depression Inventory-  
198 2<sup>nd</sup> edition (BDI-II), Levenson Multidimensional Locus of Control scale (including the  
199 Internality subscale (I), Powerful Others subscale (P), and Chance subscale (C)), Frost  
200 Multidimensional Perfectionism Scale (F-MPS), Rotter's Locus of Control Scale (Rotter), Penn  
201 State Worry Questionnaire (PSWQ), the State-Trait Anxiety Inventory (STAI), and lastly the  
202 Obsessive-Compulsive Inventory short version (OCI-R). We list all measures here for sake of  
203 completeness and transparency. However, the current study focuses on perfectionism and locus  
204 of control and therefore, statistical analyses focused on the measures of perfectionism and locus  
205 of control (F-MPS, Rotter, Levenson subscales) Additional questionnaires were used simply as  
206 supplementary questionnaires in order to describe our sample. Therefore, no analyses, including  
207 correlations with ERP data, were run on BDI-II, OCI-R, and PSWQ. Descriptions of the

208 additional scales can be found in the supplementary materials on OSF, with means, standard  
209 deviations, and ranges for all scales being reported in Table S1.

210 The F-MPS has been used to assess various dimensions of perfectionistic traits and relate  
211 perfectionism to various psychiatric disorders (58,59). The F-MPS includes six subscales,  
212 including concern over mistakes (CoM), personal standards (PS), parental expectations (PE),  
213 parental criticism (PC), doubts about actions (DaA), and organization (O; (60)). Cronbach's  
214 alpha scores for all subscales of the F-MPS tend to be above 0.7 (61). For each question, there  
215 are five response choices ranging from strongly disagree (+1) to strongly agree (+5). Scores were  
216 summed for each subscale and a total sum was calculated for each participant across all scales  
217 (excluding the organization subscale; possible range of scores is 29 - 145). Per the F-MPS  
218 author's recommendation (59), our total score does not include the organizational scale due to  
219 the fact that organization is not a major indicator of perfectionism but can be a personality trait  
220 found in someone with perfectionistic tendencies. Cronbach's alpha for the F-MPS scale without  
221 the organization subscale for our current sample was 0.86 ( $M(SD) = 82.91(12.01)$ , range = 53-  
222 113).

223 The Rotter scale was used as a measure of locus of control (Rotter, 1966). Twenty-three  
224 of the 29 items (6 items were distractors) were scored with a one indicating a more external locus  
225 of control and a zero indicating a more internal locus of control. Total scores range from 0-23,  
226 with a lower score indicating a more internal locus of control and a high score indicating a more  
227 external locus of control. Cronbach's alpha for the Rotter scale in our sample was 0.54 ( $M(SD) =$   
228  $9(3.04)$ , range = 3-19).

229 The Levenson Multidimensional Locus of Control scale was also used in order to  
230 quantify internal and external locus of control (Levenson, 1981). Each of the 24 statements

231 included in the scale was rated on a six-point scale and then rescored from -3 to 3 (excluding 0).  
232 As there is not a total score for the Levenson scale, the questionnaire was broken down into its  
233 three subscales: Internality (Levenson-I), Powerful Others, (Levenson-P), and Chance  
234 (Levenson-C). Within the subscales scores were summed and then a constant of 24 was added to  
235 each score in order to get rid of negative values. Each subscale had a minimum score of 0 and a  
236 maximum score of 48 points. The overall Cronbach's alpha for the Levenson scale in our current  
237 sample was 0.74. When broken down by each subscale, the Levenson-I scale had a Cronbach's  
238 alpha of 0.58 ( $M(SD) = 10.07(5.47)$ , range = 2-24). The Levenson-P subscale had a Cronbach's  
239 alpha of 0.71 ( $M(SD) = 30.11(7.30)$ , range = 13-47). Lastly, the Levenson-C subscale had a  
240 Cronbach's alpha of 0.73 ( $M(SD) = 32.03(7.14)$ , range = 18-80). Scatter plots of all  
241 questionnaires by ERN and RewP difference amplitude are shown in Fig 1 signifying adequate  
242 range and distribution in questionnaire scores.

243 **Fig 1. Scatter plots depicting all scales of interest by  $\Delta$ ERN amplitude or  $\Delta$ RewP amplitude**

244 After the questionnaires, participants completed two separate computerized tasks in  
245 counterbalanced order while electroencephalogram (EEG) data were recorded. Participants  
246 completed a modified version of the Ericksen Flanker task (61). Incongruent (e.g. <<><<) and  
247 congruent (e.g. <<<<<) arrow groups were randomly presented in 36-point Arial white font  
248 were presented in the center of a black screen. Participants were instructed to respond as quickly  
249 and accurately as possible by pressing a button that corresponded to the direction of the middle  
250 arrow. Flanking arrows were presented for 100 ms prior to onset of the middle arrow, which  
251 remained on the screen with the middle arrow for an additional 600 ms. In between trials, a  
252 fixation cross was shown for randomized intervals of 300, 500, and 700 ms. Two blocks of three

253 hundred trials each (600 total trials) were completed with 50% of trials being congruent and 50%  
254 of trials being incongruent.

255 For the doors task (17,30) participants were shown two doors side by side on a black  
256 background and were instructed to click the corresponding mouse button to choose a door on  
257 either the left or right. Participants were told that if they chose correctly, they would see a green  
258 arrow pointing upward, but if they chose incorrectly they would see a red arrow pointing  
259 downward. For every correct choice, they would gain 80 cents while they would lose 40 cents  
260 for every incorrect choice. Doors were presented until the participant clicked a left or right  
261 mouse button; there was no time limit for making the choice. After a door was chosen,  
262 participants were presented with feedback for 2000 ms, although this feedback had no relation to  
263 the actual door chosen. Each participant completed 50 trials with 25 wins and 25 losses, for a  
264 total of \$10. The order of positive or negative feedback was randomized.

## 265 **Electroencephalogram Recording and Reduction**

266 EEG data were recorded from 128 equidistant passive Ag/AgCl electrodes on a hydrocel  
267 geodesic sensor net from Electrical Geodesics, Inc. using the NA 300 amplifier system (EGI;  
268 Eugene, OR; 20K nominal gain, bandpass = .10-100 Hz). Data were referenced to the vertex  
269 electrode (Cz) during data collection and digitized continuously at 250 Hz with a 16-bit analog to  
270 digital converter. According to manufacturer's instruction, impedances were kept below 50k $\Omega$ .  
271 Offline, data were digitally high-pass filtered with a first-order 0.1 Hz filter, and digitally low  
272 pass filtered at 30 Hz (12 db/octave butterworth filter) in NetStation (version 4.5.7). For the ERN  
273 and Pe, data were then segmented from 400 ms prior- to 600 ms post-response for correct and  
274 incorrect trials. For the RewP, data were segmented from 200 ms before feedback presentation to  
275 800 ms after feedback. Eye movements and blink artifacts were then corrected using independent

276 components analysis (ICA) in the ERP PCA Toolkit in MatLab (62). If any ICA component  
277 correlated with two blink templates (one template being provided by the ERP PCA Toolkit and  
278 one template being derived from previous data by the authors) at a rate of 0.9 or higher, that  
279 component was removed from the data. Further, if the fast average amplitude of a particular  
280 channel was greater than 100 microvolts or if the differential average amplitude was greater than  
281 50 microvolts, the channel was defined as bad and the nearest neighbor approach (using six  
282 electrodes) was used to interpolate the data for said bad electrode (62).

283         Finally, data were re-referenced offline in the ERP PCA Toolkit using an averaged  
284 reference and baseline adjusted from 400 to 200 ms before response for the ERN and Pe and  
285 from 200 to 0 ms before the presentation of feedback for the RewP, after which trials were  
286 averaged together. The mean amplitude was extracted between 0 and 100 ms for the ERN,  
287 between 200 and 400 ms for the Pe, and between 250 and 325 ms for the RewP. The use of a  
288 mean amplitude was decided *a priori* due to research suggesting mean amplitude is more reliable  
289 than other ERP peak extractions (8,63). The *a priori* time windows for all three ERPs were  
290 decided on through the use of the collapsed localizers approach. The collapsed localizer  
291 approach entails collapsing across all groups and variables to view one grand-averaged  
292 waveform in order to decide what window to pull mean amplitude from (64). In order to improve  
293 reliability of ERP measurement, we used a region of interest (ROI) for selecting electrodes (65).  
294 For both the ERN and RewP, ERP data were averaged across four fronto-central electrodes (6  
295 [FCz], 7, 107, 129 [Cz]; see (66) for electrode montage), as decided *a priori*. Electrode locations  
296 were chosen due to previous research suggesting that the ERN and RewP are maximal at these  
297 frontocentral locations (e.g., (67)). For the Pe, data were averaged across electrodes 54, 55, 61,

298 62, 78, and 79, as also decided *a priori*. All ERP component mean amplitudes for all trial types  
 299 are reported in Table 1.

**Table 1. Means and standard deviations for ERP components, task accuracy, and response time**

|                                             | Mean  | Standard<br>Deviation | Range<br>(min,max) |
|---------------------------------------------|-------|-----------------------|--------------------|
| CRN amplitude ( $\mu\text{V}$ )             | 1.9   | 1.6                   | (-2.9, 5.9)        |
| ERN amplitude ( $\mu\text{V}$ )             | -1.1  | 2.3                   | (-7.7, 4.2)        |
| ERN difference amplitude ( $\mu\text{V}$ )  | -2.9  | 2.3                   | (-10.2, 2.7)       |
| RewP positive feedback ( $\mu\text{V}$ )    | 5.2   | 3.3                   | (-0.01, 20.0)      |
| RewP negative feedback ( $\mu\text{V}$ )    | 3.3   | 2.8                   | (-3.3, 15.3)       |
| RewP difference amplitude ( $\mu\text{V}$ ) | 1.9   | 1.9                   | (-2.3, 9.2)        |
| Pe correct amplitude ( $\mu\text{V}$ )      | -0.6  | 0.9                   | (-3.3, 1.1)        |
| Pe incorrect amplitude ( $\mu\text{V}$ )    | 3.9   | 2.6                   | (-1.6, 15.4)       |
| Pe difference amplitude ( $\mu\text{V}$ )   | 4.6   | 2.8                   | (-2.4, 18.5)       |
| Congruent trial flanker accuracy (%)        | 96.5% | 4.2%                  | (62%, 100%)        |
| Incongruent trial flanker accuracy (%)      | 90.2% | 7.3%                  | (59.1%, 99.3%)     |
| Post Correct accuracy (%)                   | 94.2% | 3.8%                  | (81.6%, 98.6%)     |
| Post Error accuracy (%)                     | 84.0% | 13.5%                 | (2.68%, 100%)      |
| Correct Congruent Flanker RT                | 387.8 | 38.7                  | (298, 488.5)       |
| Correct Incongruent Flanker RT              | 459.5 | 35.4                  | (382, 555)         |
| Incorrect Congruent Flanker RT              | 351.5 | 163.8                 | (0, 761)           |
| Incorrect Incongruent Flanker RT            | 302   | 73.8                  | (0, 509)           |
| Overall Doors RT                            | 524.5 | 504.1                 | (0, 4232)          |

*Note:*  $\mu\text{V}$ = microvolts,. ERN difference amplitude = incorrect minus correct.

RewP difference amplitude = correct minus incorrect feedback

Pe difference amplitude = incorrect minus correct.

For all reaction times, the median was calculated.

300 In order to determine minimum number of trials needed to ensure adequate reliability,  
 301 dependability estimates of ERP data were assessed through the ERP Reliability Analysis  
 302 Toolbox v0.3.2 (68). Dependability estimates for all components are quite high (above 0.83) and  
 303 are presented in Table 2. For the ERN, a minimum number of 94 correct responses and 6  
 304 incorrect responses were required; therefore, 31 participants were excluded from ERN and Pe  
 305 analyses due to fewer than aforementioned trial numbers. For the RewP, a minimum number of  
 306 12 correct feedback trials and 12 incorrect feedback trials were needed. Therefore, 31

307 participants were excluded from RewP analysis due to lack of sufficient trials. Overall,  
308 dependability estimates suggest a high level of reliability, allowing reasonable conclusions to be  
309 drawn from the data (see Table 2). Due to the non-independence of difference scores, the  
310 dependability of difference scores was not calculated. However, exploratory analyses using the  
311 residualized difference instead of a subtraction difference are provided below (57).

**Table 2: ERP dependability and noise estimates**

| Trial Type                | Dependability | 95% Credible Intervals | Minimum Trials | Mean(SD) Trials | Trial Range | Noise Mean(SD) |
|---------------------------|---------------|------------------------|----------------|-----------------|-------------|----------------|
| Correct Response (ERN)    | 0.98          | (0.98, 0.99)           | 94             | 487.6(83.9)     | 94 - 583    | 0.4(0.4)       |
| Incorrect Response (ERN)  | 0.83          | (0.78, 0.87)           | 6              | 27.8(26.1)      | 6 - 223     | 1.8(1.6)       |
| Correct Feedback (RewP)   | 0.9           | (0.87, 0.92)           | 12             | 1.7(0.4)        | 12-25       | 1.7(0.4)       |
| Incorrect Feedback (RewP) | 0.87          | (0.83, 0.90)           | 12             | 1.8(0.5)        | 9-25        | 1.8(0.5)       |
| Correct Response (Pe)     | 0.95          | (0.94, 0.96)           | 94             | 488.8(83.9)     | 94 - 583    | 0.4(0.4)       |
| Incorrect Response (Pe)   | 0.83          | (0.78, 0.87)           | 6              | 27.8(26.1)      | 6 - 223     | 1.8(1.6)       |

## 312 **Data Analysis**

### 313 **Behavioral Data Analyses**

314 Median response times (RT) and mean accuracy are presented for the flanker task as a  
315 function of congruency and accuracy and median RT from the doors task (see Table 1). We  
316 chose *a priori* to correlate incongruent-trial accuracy and correct-trial incongruent RTs from the  
317 flanker task and RT from the doors task with each of the five perfectionism/locus of control  
318 scales administered (Frost, Rotter, Levenson I, Levenson P, and Levenson C) to assess if  
319 perfectionism or locus of control correlated with behavioral performance during the more  
320 cognitively demanding task trials. As a manipulation check, two paired samples *t*-tests

321 comparing accuracy between congruent and incongruent trials and response times between  
322 congruent and incongruent trials were conducted for the flanker task.

323 In order to calculate post-error slowing (the amount a participant's response time slows  
324 after an erroneous response (69)), we extracted the RT for every correct trial that was preceded  
325 by an error (i.e., post-error RT) and for every correct trial that was followed by an error (i.e., pre-  
326 error RT). Pre-error RT was then subtracted from post-error RT to get one value of post-error  
327 slowing (for methodology (69)). This was also done for correct trials that were preceded or  
328 followed by a correct trial (i.e., pre-correct RT subtracted from post-correct RT; see Table 1). A  
329 2-Accuracy (error slowing, correct slowing) x 2-Trial-type (congruent, incongruent) repeated  
330 measures ANOVA was then performed to determine if post error or correct RT slowing was  
331 significantly different by trial congruency, with general eta squared used as a measure of effect  
332 size. Paired-samples *t*-tests were performed to determine if mean post-error RT differed from  
333 mean post-correct trial RT broken apart by congruency with Cohen's  $d_z$  used as a measure of  
334 effect size. Correlations of error slowing were conducted with the Frost, Rotter, Levenson I,  
335 Levenson P, and Levenson C scales.

### 336 **ERP Analyses**

337 Three paired samples *t*-tests were conducted to ensure that ERP effects were present (i.e.,  
338 ERN amplitude was different than CRN amplitude). for the ERN, RewP, and Pe. In order to test  
339 our first hypothesis that individuals with increased perfectionistic tendencies would have greater  
340 ERN (more negative) amplitude and smaller (less negative) RewP amplitude compared to those  
341 with lower perfectionistic tendencies, we conducted two multiple linear regressions with age,  
342 gender (male=0; female=1), and total score on the F-MPS predicting  $\Delta$ ERN and  $\Delta$ RewP



343 amplitude. A third multiple linear regression was conducted with age, gender, and total score on  
344 the F-MPS predicting  $\Delta Pe$ .

345 To test our second hypothesis that individuals with a more internal locus of control will  
346 exhibit larger  $\Delta ERN$  amplitudes and smaller  $\Delta RewP$  amplitudes compared to those with a more  
347 external locus of control, we performed eight multiple linear regressions. For the first two  
348 regressions, age, gender, and total score on the Rotter scale predicted either  $\Delta ERN$  or  $\Delta RewP$ .  
349 The last six multiple linear regressions had age, gender, and one of the Levenson subscales  
350 (Levenson-I, Levenson-C, Levenson-P) predicting either  $\Delta ERN$  or  $\Delta RewP$ . The subscales were  
351 entered into separate regressions, as there is not a total score for the Levenson scale and we  
352 wanted to ensure multicollinearity assumptions were met. Four more linear regressions were  
353 performed on  $\Delta Pe$  amplitudes with age, gender, and Rotter scale or each of the Levenson  
354 subscales predicting difference score amplitude as exploratory analyses.

355 For all regression models, standardized betas are reported. Adjusted  $R^2$ ,  $\Delta R^2$ , and Cohen's  
356  $f^2$  are reported as measures of effect sizes while variance inflation factor (VIF) scores are  
357 reported as measures of multi-collinearity. All models were acceptable for homoscedasticity and  
358 met basic assumptions for multicollinearity. Normality of residuals was adequate.

359 We decided *a priori* that if the models predicting  $\Delta ERN$  difference amplitude were  
360 significant, exploratory analysis would be conducted to see whether it was the correct responses  
361 (represented by the correct response negativity [CRN]) or the erroneous responses represented by  
362 the ERN) that drove significant findings. We also decided *a priori* that if the models including  
363 the F-MPS were significant, further exploratory analyses would be completed to see which of the  
364 six subscales were significant, but only if the initial analyses were significant.

### 365 **Sensitivity Analysis and Exploratory Analyses**

366 We conducted a sensitivity analysis in G\*Power (v3.1) for both the  $\Delta$ ERN and  $\Delta$ RewP in  
367 order to determine what size of an effect we were powered to detect. A linear multiple regression  
368 fixed model with  $R^2$  deviation from zero was computed for 80% power. For the  $\Delta$ ERN and  $\Delta$ Pe  
369 with a final study size of 128, we were powered at 80% to detect an effect size ( $f^2$ ) of at least  
370 0.09, which is between a small and medium-sized effect. For the  $\Delta$ RewP with a final sample size  
371 of 119, we were powered at 80% to similarly detect an effect size of 0.09.

372 Due to evidence that difference waves may be insufficiently reliable (55–57), exploratory  
373 analyses further investigating the relationship between ERP amplitudes and measures of  
374 perfectionism and locus of control were performed in order to ensure that the current results are  
375 not due to unreliable data. As an alternative to the difference wave, residuals between the ERP of  
376 interest and the opposite ERP (e.g., the error and correct trial waveforms) can be examined (57).  
377 Therefore, twelve additional exploratory linear regression were performed. For the first three  
378 regressions, age, gender, and scale score (F-MPS, Rotter, Lev-I, Lev-P, Lev-C) predicted the  
379 residuals between the ERN and correct-related negativity (CRN). For the next three regressions,  
380 age, gender, and scale score predicted the residuals between the RewP and amplitude values on  
381 incorrect feedback trials. For the last three regressions, age, gender, and scale score predicted the  
382 residuals between Pe amplitude on correct trials and error trials. Additionally, twelve linear  
383 regressions were performed predicting single ERP amplitude values. The first three regressions  
384 used age, gender, and scale score to predict ERN amplitude. The next three regressions used age,  
385 gender, and scale score to predict the RewP amplitude. The last three regressions used age,  
386 gender, and scale score to predict Pe amplitude.

## 387 **Results**

### 388 **Behavioral Data**

389 For the flanker task, paired samples  $t$ -tests showed that there was greater accuracy for  
390 congruent versus incongruent trials ( $t(127) = 11.41, p < 0.001, d_z = 1.07$ ) and correct-trial RTs  
391 were faster for congruent trials than for incongruent trials ( $t(127) = 40.61, p < 0.001, d_z = 1.98$ ).  
392 None of the perfectionism or locus of control scales were significantly correlated with  
393 incongruent accuracy on the flanker task, incongruent correct RTs on the flanker task, or overall  
394 RTs for the doors task (see Table S2 for correlation values and  $p$ -values).

395 Participants got 94% of trials correct following a correct response ( $SD_{\text{post-correct}} = 3.77$ ),  
396 while they answered correctly on only 84% of trials following an erroneous response ( $SD_{\text{post-error}}$   
397  $= 13.49$ ). Accurate post-error trials had a significantly longer RTs than accurate post-correct  
398 trials ( $t(127) = 12.38, p < 0.001, d_z = 0.89$ ), indicative of significant post-error slowing. The 2-  
399 Accuracy (error slowing, correct slowing) x 2-Trial-type (congruent, incongruent) ANOVA  
400 revealed a main effect of both accuracy ( $F_{\text{correct}}[1,127] = 216.76, p_{\text{correct}} < 0.001, \eta^2_{\text{correct}} =$   
401  $0.34$ ) and congruency ( $F_{\text{congruency}}[1,127] = 18.41, p_{\text{congruency}} < 0.001, \eta^2_{\text{congruency}} = 0.03$ ) with a  
402 significant interaction of the two ( $F[1,127] = 21.50, p < 0.001, \eta^2 = 0.04$ ). Post-hoc paired  
403 samples  $t$ -tests revealed that on both congruent and incongruent trials, participants slowed down  
404 significantly more after an error than after a correct response ( $t(127) = 14.41, p < 0.001, d =$   
405  $0.52, t(127) = 7.95, p < 0.001, d_z = 1.01$ , respectively). No correlations between post-error  
406 slowing and the perfectionism or locus of control scales were significant (all  $r$ 's  $< .02, ns > .05$ ,  
407 see Table S2).

## 408 ERP Results

409 See Fig 2 for CRN, ERN, and  $\Delta$ ERN amplitude. See Fig 3 for incorrect feedback, RewP  
410 and  $\Delta$ RewP amplitude. See Fig 4 for incorrect response, correct response, Pe amplitude. All ERP  
411 effects were present, namely, ERN amplitude was more negative than CRN amplitude ( $t(127) =$

412 14.45,  $p < 0.001$ ,  $d = 1.28$ ), Pe error amplitude was more positive than Pe correct-trial amplitude  
 413 ( $t(127) = -18.29$ ,  $p < 0.001$ ,  $d = -1.62$ ) and RewP amplitude was more positive following reward  
 414 than non-reward feedback ( $t(127) = 10.53$ ,  $p < 0.001$ ,  $d = 0.97$ ).

415 **Fig 2. ERN for erroneous responses, correct responses, and the difference wave during the**  
 416 **Flanker task. Scalp distribution of the difference wave (incorrect minus correct responses).**

417 **Fig 3. RewP for correct feedback, incorrect feedback, and the difference wave during the**  
 418 **Doors task. Scalp distribution of the difference wave (correct minus incorrect feedback).**

419 **Fig 4. Pe for erroneous responses, correct responses, and the difference wave during the**  
 420 **Flanker task. Scalp distribution of the difference wave (incorrect minus correct responses).**

#### 421 **Frost Multi-Perfectionism Scale**

422 Linear regression results for both the perfectionism scale (as measured by the F-MPS as  
 423 reported below) and locus of control (as measured by the Rotter) are reported in Table 3. When  
 424 testing our first hypothesis that larger  $\Delta$ ERN but blunted  $\Delta$ RewP amplitudes would be associated  
 425 with perfectionistic tendencies as measured by the F-MPS, after controlling for age and gender,  
 426 F-MPS total scores did not significantly predict  $\Delta$ ERN amplitude ( $\beta = -0.05$ ,  $p = 0.55$ ). Similarly,  
 427 after adjusting for age and gender, F-MPS scores did not predict  $\Delta$ RewP amplitude ( $\beta = 0.07$ ,  $p$   
 428  $= 0.44$ ). For the Pe, F-MPS total scores did not predict  $\Delta$ Pe amplitudes ( $\beta = -0.05$ ,  $p = 0.58$ ).

**Table 3: Multiple linear regressions with Frost Perfectionism scale and Rotter locus of control predicting difference amplitudes**

|                                                   | $\beta$ | $t$   | $\Delta R^2$ | VIF  | $F$  | $df$   | Adj. $R^2$ | Cohen's $f^2$ |
|---------------------------------------------------|---------|-------|--------------|------|------|--------|------------|---------------|
| <b>ERN Difference Amplitude Model with Frost</b>  |         |       |              |      | 2.5  | 3, 124 | 0.03       | 0.06          |
| Gender                                            | -0.1    | -0.8  | 0.004        | 1.00 |      |        |            |               |
| Age                                               | -0.2    | -2.5* | 0.049        | 1.00 |      |        |            |               |
| Frost Total                                       | -0.1    | -0.6  | 0.003        | 1.00 |      |        |            |               |
| <b>RewP Difference Amplitude Model with Frost</b> |         |       |              |      | 0.27 | 3, 113 | -0.02      | 0.01          |
| Gender                                            | -0.04   | -0.40 | 0.00         | 1.01 |      |        |            |               |
| Age                                               | 0.00    | 0.02  | 0.00         | 1.01 |      |        |            |               |
| Frost Total                                       | 0.07    | 0.77  | 0.00         | 1.02 |      |        |            |               |

|                                                    |       |        |         |      |      |        |       |      |
|----------------------------------------------------|-------|--------|---------|------|------|--------|-------|------|
| <b>Pe Difference Amplitude Model with Frost</b>    |       |        |         |      | 1.5  | 3, 124 | 0.01  | 0.04 |
| Gender                                             | -0.1  | -1.5   | 0.02    | 1.00 |      |        |       |      |
| Age                                                | -0.1  | -1.3   | 0.02    | 1.00 |      |        |       |      |
| Frost Total                                        | -0.1  | -0.6   | 0.002   | 1.00 |      |        |       |      |
| <b>ERN Difference Amplitude Model with Rotter</b>  |       |        |         |      | 2.33 | 3, 124 | -0.01 | 0.06 |
| Gender                                             | -0.06 | -0.73  | 0.004   | 1.00 |      |        |       |      |
| Age                                                | -0.23 | -2.57* | 0.05    | 1.01 |      |        |       |      |
| Rotter Total                                       | -0.01 | -0.15  | < 0.001 | 1.01 |      |        |       |      |
| <b>RewP Difference Amplitude Model with Rotter</b> |       |        |         |      | 0.71 | 3, 113 | -0.01 | 0.02 |
| Gender                                             | -0.04 | -0.48  | 0.00    | 1.01 |      |        |       |      |
| Age                                                | -0.01 | -0.05  | 0.00    | 1.01 |      |        |       |      |
| Rotter Total                                       | -0.13 | -1.38  | 0.02    | 1.01 |      |        |       |      |
| <b>Pe Difference Amplitude Model with Rotter</b>   |       |        |         |      | 1.68 | 3, 124 | 0.02  | 0.04 |
| Gender                                             | -0.13 | -1.51  | 0.02    | 1.00 |      |        |       |      |
| Age                                                | -0.13 | -1.49  | 0.02    | 1.01 |      |        |       |      |
| Rotter Total                                       | -0.09 | -0.98  | 0.01    | 1.01 |      |        |       |      |

Note. VIF= variance inflation factor. \* $p < .05$ . \*\* $p < .01$ . \*\*\* $p < .001$ .

#### 429 **Rotter Scale**

430 When testing our second hypothesis that larger  $\Delta$ ERN and smaller  $\Delta$ RewP amplitudes  
 431 would be observed in individuals with a more external locus of control, Rotter total scores ( $\beta = -$   
 432 0.01,  $p = 0.88$ ) did not significantly predict  $\Delta$ ERN amplitude. Rotter total scores ( $\beta = -1.38$ ,  $p =$   
 433 0.17) did not significantly predict  $\Delta$ RewP amplitude. Further, Rotter total score did not predict  
 434  $\Delta$ Pe amplitudes ( $\beta = -0.09$ ,  $p = 0.33$ ).

#### 435 **Levenson Subscales**

436 All results for the three Levenson subscales are reported in Table 4. Linear regressions  
 437 were performed for each Levenson subscale. Similar to the Rotter results, the Levenson-I  
 438 subscale ( $\beta = 0.01$ ,  $p = 0.94$ ) did not predict  $\Delta$ ERN amplitude. Again, the Levenson-P subscale  
 439 ( $\beta = -0.01$ ,  $p = 0.91$ ) did not predict  $\Delta$ ERN amplitude. Finally, the Levenson-C subscale ( $\beta =$   
 440 0.03,  $p = 0.77$ ) did not predict  $\Delta$ ERN amplitude. As a note, in the F-MPS, Rotter, Lev-I, Lev-P,  
 441 and Lev-C regressions, age did predict  $\Delta$ ERN amplitude when gender and the relevant subscale

442 were adjusted for ( $B_{F-MPS} = -2.54, p_{F-MPS} = 0.01$  ;  $B_{Rotter} = -2.57, p_{Rotter} = 0.01$  ;  $B_{Lev-I} = -2.55$  ,  
 443  $p_{Lev-I} = 0.01$  ;  $B_{Lev-P} = -2.55, p_{Lev-P} = 0.01$  ;  $B_{Lev-C} = -2.58, p_{Lev-C} = 0.01$ ). For the  $\Delta$ RewP multiple  
 444 linear regressions, none of the Levenson subscales predicted  $\Delta$ RewP amplitudes ( $B_{Lev-I} = -0.02$ ,  
 445  $p_{Lev-I} = 0.86$ ;  $B_{Lev-P} = -0.06, p_{Lev-P} = -0.68$ ;  $B_{Lev-C} = -0.01, p_{Lev-C} = 0.90$ ). Similarly, none of the  
 446 Levenson subscales predicted  $\Delta$ Pe amplitudes ( $B_{Lev-I} = -0.04, p_{Lev-I} = 0.68$ ;  $B_{Lev-P} = 0.11, p_{Lev-P} =$   
 447  $0.21$ ;  $B_{Lev-C} = 0.13, p_{Lev-C} = 0.14$ ).

**Table 4: Multiple linear regressions with Levenson subscales (locus of control) predicting difference amplitudes**

|                                                   | $\beta$ | $t$    | $\Delta R^2$ | VIF  | $F$  | $df$   | Adj. $R^2$ | Cohen's $f^2$ |
|---------------------------------------------------|---------|--------|--------------|------|------|--------|------------|---------------|
| <b>ERN Difference Amplitude Model with Lev I</b>  |         |        |              |      | 2.32 | 3, 124 | 0.03       | 0.05          |
| Gender                                            | -0.07   | -0.73  | 0.00         | 1.02 |      |        |            |               |
| Age                                               | -0.22   | -2.55* | 0.05         | 1.01 |      |        |            |               |
| Lev I Total                                       | 0.01    | 0.08   | 0.00         | 1.03 |      |        |            |               |
| <b>RewP Difference Amplitude Model with Lev I</b> |         |        |              |      | 0.08 | 3, 113 | -0.02      | 0.002         |
| Gender                                            | -0.04   | -0.43  | 0.00         | 1.02 |      |        |            |               |
| Age                                               | 0.01    | 0.08   | 0.00         | 1.01 |      |        |            |               |
| Lev I Total                                       | -0.02   | -0.18  | 0.00         | 1.02 |      |        |            |               |
| <b>Pe Difference Amplitude Model with Lev I</b>   |         |        |              |      | 1.41 | 3, 124 | 0.01       | 0.03          |
| Gender                                            | -0.13   | -1.42  | 0.02         | 1.03 |      |        |            |               |
| Age                                               | -0.13   | -1.43  | 0.02         | 1.01 |      |        |            |               |
| Lev I Total                                       | -0.04   | -0.42  | 0.00         | 1.03 |      |        |            |               |
| <b>ERN Difference Amplitude Model with Lev P</b>  |         |        |              |      | 2.33 | 3, 124 | 0.03       | 0.06          |
| Gender                                            | -0.06   | -0.73  | 0.00         | 1.01 |      |        |            |               |
| Age                                               | -0.22   | -2.55* | 0.05         | 1.01 |      |        |            |               |
| Lev P Total                                       | -0.01   | -0.11  | 0.00         | 1.01 |      |        |            |               |
| <b>RewP Difference Amplitude Model with Lev P</b> |         |        |              |      | 0.22 | 3, 113 | -0.02      | 0.001         |
| Gender                                            | -0.05   | -0.49  | 0.00         | 1.00 |      |        |            |               |
| Age                                               | 0.01    | 0.12   | 0.00         | 1.00 |      |        |            |               |
| Lev P Total                                       | -0.06   | -0.68  | 0.00         | 1.00 |      |        |            |               |
| <b>Pe Difference Amplitude Model with Lev P</b>   |         |        |              |      | 1.9  | 3, 124 | 0.02       | 0.05          |
| Gender                                            | -0.12   | -1.37  | 0.02         | 1.01 |      |        |            |               |
| Age                                               | -0.13   | -1.5   | 0.02         | 1.01 |      |        |            |               |
| Lev P Total                                       | 0.11    | 1.27   | 0.01         | 1.02 |      |        |            |               |
| <b>ERN Difference Amplitude Mode with Lev C</b>   |         |        |              |      | 2.35 | 3, 124 | 0.03       | 0.06          |
| Gender                                            | -0.06   | -0.74  | 0.00         | 1.00 |      |        |            |               |
| Age                                               | -0.23   | -2.58* | 0.05         | 1.01 |      |        |            |               |
| Lev C Total                                       | 0.03    | 0.3    | 0.00         | 1.01 |      |        |            |               |
| <b>RewP Difference Amplitude Model with Lev C</b> |         |        |              |      | 0.08 | 3, 113 | -0.03      | 0.002         |
| Gender                                            | -0.04   | -0.45  | 0.00         | 1.01 |      |        |            |               |
| Age                                               | 0.01    | 0.11   | 0.00         | 1.01 |      |        |            |               |

|                                                 |       |       |      |      |      |        |      |      |
|-------------------------------------------------|-------|-------|------|------|------|--------|------|------|
| Lev C Total                                     | -0.01 | -0.13 | 0.00 | 1.02 |      |        |      |      |
| <b>Pe Difference Amplitude Model with Lev C</b> |       |       |      |      | 2.12 | 3, 124 | 0.03 | 0.05 |
| Gender                                          | -0.14 | -1.56 | 0.02 | 1.01 |      |        |      |      |
| Age                                             | -0.13 | -1.52 | 0.02 | 1.01 |      |        |      |      |
| Lev C Total                                     | 0.13  | 1.5   | 0.02 | 1.01 |      |        |      |      |

Note. VIF= variance inflation factor. \* $p < .05$ . \*\* $p < .01$ . \*\*\* $p < .001$ .

448 The results of the residual exploratory analyses can be found in Tables 5 and 6. All other  
 449 results of the exploratory analyses are reported in the supplementary tables available on OSF  
 450 (<https://osf.io/8pkzu/>; Tables S6 and S7). All results of the exploratory analyses matched the  
 451 previously reported results and showed no statistically-significant predictions between  
 452 residualized ERN or RewP and perfectionism or locus of control scales.

**Table 5: Multiple linear regressions with Frost Perfectionism scale and Rotter locus of control scale predicting residual values**

|                                        | $\beta$ | $t$    | $\Delta R^2$ | VIF  | $F$  | $df$  | Adj. $R^2$ | Cohen's $f^2$ |
|----------------------------------------|---------|--------|--------------|------|------|-------|------------|---------------|
| <b>ERN Residual Model with Frost</b>   |         |        |              |      | 2.75 | 3,124 | 0.04       | 0.07          |
| Gender                                 | -0.11   | -1.25  | .004         | 1.00 |      |       |            |               |
| Age                                    | -0.22   | -2.52* | 0.04         | 1.00 |      |       |            |               |
| Frost Total                            | -0.06   | -0.68  | < 0.001      | 1.00 |      |       |            |               |
| <b>RewP Residual Model with Frost</b>  |         |        |              |      | 0.26 | 3,113 | -0.02      | 0.01          |
| Gender                                 | -0.03   | -0.30  | 0.00         | 1.01 |      |       |            |               |
| Age                                    | -0.01   | -0.12  | 0.00         | 1.01 |      |       |            |               |
| Frost Total                            | 0.08    | 0.81   | 0.01         | 1.02 |      |       |            |               |
| <b>Pe Residual Model with Frost</b>    |         |        |              |      | 1.07 | 3,124 | 0.00       | 0.03          |
| Gender                                 | -0.14   | -1.6   | 0.02         | 1.00 |      |       |            |               |
| Age                                    | -0.06   | -0.68  | -0.001       | 1.00 |      |       |            |               |
| Frost Total                            | -0.04   | -0.54  | -0.006       | 1.00 |      |       |            |               |
| <b>ERN Residual Model with Rotter</b>  |         |        |              |      | 2.58 | 3,124 | 0.04       | 0.06          |
| Gender                                 | -0.11   | -1.23  | 0.004        | 1.00 |      |       |            |               |
| Age                                    | -0.22   | -2.54* | 0.04         | 1.01 |      |       |            |               |
| Rotter Total                           | 0       | -0.03  | -0.008       | 1.01 |      |       |            |               |
| <b>RewP Residual Model with Rotter</b> |         |        |              |      | 0.68 | 3,113 | -0.01      | 0.02          |
| Gender                                 | -0.04   | -0.38  | 0.00         | 1.00 |      |       |            |               |
| Age                                    | -0.02   | -0.19  | 0.00         | 1.01 |      |       |            |               |
| Rotter Total                           | -0.13   | -1.38  | 0.02         | 1.01 |      |       |            |               |
| <b>Pe Residual Model with Rotter</b>   |         |        |              |      | 1.19 | 3,124 | 0.01       | 0.03          |
| Gender                                 | -0.14   | -1.59  | 0.01         | 1.00 |      |       |            |               |
| Age                                    | -0.07   | -0.77  | -0.003       | 1.01 |      |       |            |               |
| Rotter Total                           | -0.07   | -0.82  | -0.003       | 1.01 |      |       |            |               |

Note. VIF= variance inflation factor. \* $p < .05$ . \*\* $p < .01$ . \*\*\* $p < .001$ .

453

**Table 6: Multiple linear regressions with Levenson subscales locus of control predicting residual values**

|                                             | $\beta$ | $t$    | $\Delta R^2$ | VIF  | $F$  | $df$  | Adj. $R^2$ | Cohen's $f^2$ |
|---------------------------------------------|---------|--------|--------------|------|------|-------|------------|---------------|
| <b>ERN Residual Value Model with Lev I</b>  |         |        |              |      | 2.65 | 3,124 | 0.04       | 0.06          |
| Gender                                      | -0.11   | -1.28  | 0.005        | 1.03 |      |       |            |               |
| Age                                         | -0.22   | -2.51* | 0.04         | 1.01 |      |       |            |               |
| Lev I Total                                 | 0.04    | 0.42   | -0.009       | 1.03 |      |       |            |               |
| <b>RewP Residual Value Model with Lev I</b> |         |        |              |      | 0.06 | 3,113 | -0.03      | 0.00          |
| Gender                                      | -0.03   | -0.32  | 0.00         | 1.02 |      |       |            |               |
| Age                                         | -0.00   | -0.06  | 0.00         | 1.01 |      |       |            |               |
| Lev I Total                                 | -0.02   | -0.24  | 0.00         | 1.02 |      |       |            |               |
| <b>Pe Residual Model with Lev I</b>         |         |        |              |      | 1.01 | 3,124 | 0.00       | 0.02          |
| Gender                                      | -0.14   | -1.51  | 0.01         | 1.02 |      |       |            |               |
| Age                                         | -0.07   | -0.73  | -0.004       | 1.01 |      |       |            |               |
| Lev I Total                                 | -0.03   | -0.34  | -0.007       | 1.03 |      |       |            |               |
| <b>ERN Residual Value Model with Lev P</b>  |         |        |              |      | 2.66 | 3,124 | 0.04       | 0.06          |
| Gender                                      | -0.11   | -1.27  | 0.005        | 1.01 |      |       |            |               |
| Age                                         | -0.22   | -2.51* | 0.04         | 1.01 |      |       |            |               |
| Lev P Total                                 | -0.04   | -0.45  | -0.006       | 1.02 |      |       |            |               |
| <b>RewP Residual Value Model with Lev P</b> |         |        |              |      | 0.17 | 3,113 | -0.02      | 0.01          |
| Gender                                      | -0.04   | -0.39  | 0.00         | 1.00 |      |       |            |               |
| Age                                         | -0.00   | -0.02  | 0.00         | 1.00 |      |       |            |               |
| Lev P Total                                 | -0.06   | -0.61  | 0.00         | 1.00 |      |       |            |               |
| <b>Pe Residual Value Model with Lev P</b>   |         |        |              |      | 1.11 | 3,124 | 0.00       | 0.03          |
| Gender                                      | -0.14   | -1.51  | 0.01         | 1.01 |      |       |            |               |
| Age                                         | -0.07   | -0.75  | -0.004       | 1.01 |      |       |            |               |
| Lev P Total                                 | 0.06    | 0.66   | -0.005       | 1.02 |      |       |            |               |
| <b>ERN Residual Value Model with Lev C</b>  |         |        |              |      | 2.58 | 3,124 | 0.04       | 0.06          |
| Gender                                      | -0.11   | -1.23  | 0.004        | 1.00 |      |       |            |               |
| Age                                         | -0.22   | -2.54* | 0.04         | 1.01 |      |       |            |               |
| Lev C Total                                 | 0.00    | 0.02   | -0.008       | 1.01 |      |       |            |               |
| <b>RewP Residual Value Model with Lev C</b> |         |        |              |      | 0.05 | 3,113 | -0.03      | 0.00          |
| Gender                                      | -0.03   | -0.35  | 0.00         | 1.01 |      |       |            |               |
| Age                                         | -0.00   | -0.03  | 0.00         | 1.01 |      |       |            |               |
| Lev C Total                                 | -0.01   | -0.10  | 0.00         | 1.02 |      |       |            |               |
| <b>Pe Residual Value Model with Lev C</b>   |         |        |              |      | 1.27 | 3,124 | 0.01       | 0.03          |
| Gender                                      | -0.14   | -1.62  | 0.01         | 1.00 |      |       |            |               |
| Age                                         | -0.07   | -0.77  | -0.003       | 1.01 |      |       |            |               |
| Lev C Total                                 | 0.08    | 0.95   | < -0.001     | 1.01 |      |       |            |               |

Note. VIF= variance inflation factor. \* $p < .05$ . \*\* $p < .01$ . \*\*\* $p < .001$ .

## 454 Discussion

455 Our central purpose was to examine the relationship between perfectionism, locus of

456 control, and the  $\Delta$ ERN and  $\Delta$ RewP ERP components in a psychiatrically-healthy sample to see if



457 specific personality traits are related to internal and external performance monitoring and reward  
458 processing. Our first hypothesis that individuals with increased perfectionistic tendencies would  
459 have greater  $\Delta$ ERN amplitude and smaller  $\Delta$ RewP amplitude compared to those with lower  
460 perfectionistic tendencies was not supported as we found that perfectionistic traits were not  
461 related to indices of internal nor external performance monitoring. Further, our second  
462 hypothesis that individuals with a more internal locus of control would exhibit larger  $\Delta$ ERN  
463 amplitudes and smaller  $\Delta$ RewP amplitudes when compared to those with a more external locus  
464 of control was also not supposed as we found that locus of control, whether internal or external,  
465 did not associate with either internal or external performance monitoring. Similarly, the  
466 behavioral outcomes (i.e., response times, post-error slowing, and accuracy) were not related to  
467 perfectionism or locus of control personality traits.

468         The current body of literature concerning perfectionism and ERN amplitude suggests that  
469 perfectionism may not be related to ERN amplitude, although specific subscales of the F-MPS  
470 may be. As with the current study, Schrijvers et al. (2010) found no significant impact of total F-  
471 MPS scores on  $\Delta$ ERN amplitude in a depressed sample. However, although total F-MPS score  
472 may not be related to ERN amplitude, numerous studies have suggested that certain subscales of  
473 perfectionism, such as personal standards, concern over mistakes, and doubts about actions, may  
474 affect ERN amplitude (45,46). Stahl et al. (45), when investigating the ERN, suggests that it may  
475 be the interaction of these subscales, such as high personal standards and concern over mistakes,  
476 that moderate ERN amplitude in individuals. Although the previously cited studies support the  
477 current findings of no to a small relationship between perfectionism and ERN amplitude, Pieters  
478 et al. (70) demonstrated a significant correlation between  $\Delta$ ERN amplitude and F-MPS total  
479 scores, but only in controls and not in individuals with anorexia nervosa, who had a higher

480 average score of perfectionism. Overall, it seems that total F-MPS scores is not likely related to  
481 ERN amplitude.

482         The current results also suggest that there is no relationship between locus of control  
483 (neither external nor internal) and performance monitoring. It is possible that locus of control  
484 depends on the situation at hand, rather than being a stable personality trait. Rotter (1975)  
485 suggested that classifying people as having strictly an internal locus of control or external locus  
486 of control does not capture the entirety of the concept of locus of control. For example,  
487 individuals may have a more external locus of control in one situation but in other situations  
488 exhibit a more internal locus of control (71,72). This phenomenon is called bilocal expectancy,  
489 dual control, or shared responsibility (72). Bilocal expectancy could make it particularly difficult  
490 to parse relationships between performance monitoring ERP components and locus of control  
491 due to potential changes in the loci of control.

492         Findings from the current study should be understood in the context of limitations. First,  
493 only a psychiatrically-healthy sample of undergraduates with no psychopathology was examined,  
494 therefore removing any effects that psychopathology may have on performance monitoring.  
495 Examining only a healthy sample was done in order to control for any confounding affects  
496 psychopathology may have; however, we recognize that it limits our abilities to interpret these  
497 findings in a psychopathology context and prevents us from understanding how or if these traits  
498 would differentially affect the ERN and RewP in a sample with psychopathologies. It may be  
499 useful in future research to look other measures of perfectionism, such as the Hewitt-Flett  
500 Multidimensional Perfectionism Scale, which examines other sub-dimensions of perfectionism,  
501 such as self-oriented perfectionism, that are not measured in the F-MPS (73). Finally, although

502 we did run a wide number of analyses, findings do not suggest false positives due to Type I error  
503 as the pattern was that of non-significance.

504         Although there are several limitations, there are also several strengths in our study. After  
505 performing a post-hoc sensitivity analysis, the results suggest that our study was well powered to  
506 detect a small-to-medium sized effect. Therefore, we feel confident that if a small effect had  
507 been present, we would have been able to detect it, and that our final results are less likely due to  
508 Type II error. Another strength of our study is that we measured locus of control through two  
509 different scales, therefore allowing us to test the possibility that sub-dimensions of locus of  
510 control would be related to performance monitoring. Lastly, we had a well-controlled sample  
511 that was free of potential confounding variables, such as neurological diseases, learning  
512 disabilities, or any head injuries that resulted in unconsciousness. Therefore, we can be fairly  
513 confident that in healthy individuals, perfectionism and locus of control are not personality  
514 characteristics that affect performance monitoring, as measured by the ERN and RewP.

515         In conclusion, in the current sample, perfectionism and locus of control were not related  
516 to neural indices of internal or external performance monitoring. Future research should examine  
517 this in clinical populations or explore other characteristic traits, such as worry, that may affect  
518 performance monitoring ERP components. As we come to better understand how internal and  
519 external performance monitoring differ, we can better understand what specific cognitive deficits  
520 are present in psychopathologies, therefore aiding in diagnoses and treatment.

521

522

523

524

## 525 **Acknowledgments**

526 A Brigham Young University Mentored Environment Grant and the Brigham Young University

527 College of Family, Home, and Social Sciences funded this research.

528

529

530

531

532

533

534

535

536

537

538

539

540

541

542

543

544

545

546

547

## 548 **References**

- 549 1. Ullsperger M, von Cramon DY. Subprocesses of performance monitoring: a dissociation of  
550 error processing and response competition revealed by event-related fMRI and ERPs.  
551 *Neuroimage*. 2001;14(6):1387–401.
- 552 2. Schreiber M, Pietschmann M, Kathmann N, Endrass T. ERP correlates of performance  
553 monitoring in elderly. *Brain Cogn*. 2011 Jun;76(1):131–9.
- 554 3. Radke S, de Lange FP, Ullsperger M, de Bruijn ER, A. Mistakes that affect others: An  
555 fMRI study on processing of own errors in a social context. *Exp Brain Res Heidelb*. 2011  
556 Jun;211(3–4):405–13.
- 557 4. Olvet D, Hajcak G. The error-related negativity (ERN) and psychopathology: Toward an  
558 endophenotype. *Clin Psychol Rev*. 2008 Dec;28(8):1343–54.
- 559 5. Aarts K, Pourtois G. Anxiety not only increases, but also alters early error-monitoring  
560 functions. *Cogn Affect Behav Neurosci*. 2010 Dec;10(4):479–92.
- 561 6. Miller AE, Watson JM, Strayer DL. Individual Differences in Working Memory Capacity  
562 Predict Action Monitoring and the Error-Related Negativity. *J Exp Psychol Learn Mem*  
563 *Cogn*. 2012 May;38(3):757–63.
- 564 7. Moser JS, Moran TP, Schroder HS, Donnellan MB, Yeung N. On the relationship between  
565 anxiety and error monitoring: a meta-analysis and conceptual framework. *Front Hum*  
566 *Neurosci* [Internet]. 2013 Aug 15 [cited 2019 May 25];7. Available from:  
567 <https://www.ncbi.nlm.nih.gov/pmc/articles/PMC3744033/>
- 568 8. Luck SJ. *An Introduction to the Event-Related Potential Technique*. Cambridge, MA: MIT  
569 Press; 2005.
- 570 9. Brazdil M, Roman R, Daniel P, Rektor I. Intracerebral error-related negativity in a simple  
571 go/no-go task. *J Psychophysiol*. 2005;19(4):244–55.
- 572 10. Dehaene S, Posner MI, Tucker DM. Localization of a Neural System for Error Detection  
573 and Compensation. *Psychol Sci* 0956-7976. 1994 Sep;5(5):303–5.
- 574 11. Gehring WJ, Goss B, Coles MGH, Meyer DE, Donchin E. A Neural System for Error  
575 Detection and Compensation. *Psychol Sci* 0956-7976. 1993 Nov;4(6):385–90.
- 576 12. Vanveen V, Carter C. The anterior cingulate as a conflict monitor: fMRI and ERP studies.  
577 *Physiol Behav*. 2002 Dec;77(4–5):477–82.
- 578 13. Stemmer B, Segalowitz SJ, Witzke W, Schönle PW. Error detection in patients with lesions  
579 to the medial prefrontal cortex: an ERP study. *Neuropsychologia*. 2004 Jan;42(1):118–30.
- 580 14. Botvinick MM, Carter CS, Braver TS, Barch DM, Cohen JD. Conflict Monitoring and  
581 Cognitive Control. *Psychol Rev*. 2001 Jul;108(3):624.

- 582 15. Larson MJ, Clayson PE, Clawson A. Making sense of all the conflict: A theoretical review  
583 and critique of conflict-related ERPs. *Int J Psychophysiol.* 2014 Sep;93(3):283–97.
- 584 16. Proudfit GH, Inzlicht M, Mennin DS. Anxiety and error monitoring: the importance of  
585 motivation and emotion. *Front Hum Neurosci* [Internet]. 2013 Oct 8 [cited 2019 May 25];7.  
586 Available from: <https://www.ncbi.nlm.nih.gov/pmc/articles/PMC3792698/>
- 587 17. Proudfit GH. The reward positivity: From basic research on reward to a biomarker for  
588 depression. *Psychophysiology.* 2015 Apr;52(4):449–59.
- 589 18. Weinberg A, Liu H, Hajcak G, Shankman SA. Blunted Neural Response to Rewards as a  
590 Vulnerability Factor for Depression: Results from a Family Study. *J Abnorm Psychol.* 2015  
591 Nov;124(4):878–89.
- 592 19. Brown DR, Cavanagh JF. Rewarding images do not invoke the reward positivity: They  
593 inflate it. *Int J Psychophysiol.* 2018 Oct;132:226–35.
- 594 20. Cockburn J, Holroyd CB. Feedback information and the reward positivity. *Int J*  
595 *Psychophysiol.* 2018 Oct;132:243–51.
- 596 21. Nieuwenhuis S, Holroyd CB, Mol N, Coles MGH. Reinforcement-related brain potentials  
597 from medial frontal cortex: origins and functional significance. *Neurosci Biobehav Rev.*  
598 2004 Jul;28(4):441–8.
- 599 22. Bates AT, Kiehl KA, Laurens KR, Liddle PF. Error-related negativity and correct response  
600 negativity in schizophrenia. *Clin Neurophysiol.* 2002 Sep;113(9):1454–63.
- 601 23. Donaldson KR, Roach BJ, Ford JM, Lai K, Sreenivasan KK, Mathalon DH. Effects of  
602 conflict and strategic processing on neural responses to errors in schizophrenia. *Biol*  
603 *Psychol.* 2019 Jan;140:9–18.
- 604 24. Kopp B, Rist F. An event-related brain potential substrate of disturbed response monitoring  
605 in paranoid... *J Abnorm Psychol.* 1999 May;108(2):337.
- 606 25. Santesso DL, Drmic IE, Jetha MK, Bryson SE, Goldberg JO, Hall GB, et al. An event-  
607 related source localization study of response monitoring and social impairments in autism  
608 spectrum disorder. *Psychophysiology.* 2011 Feb;48(2):241–51.
- 609 26. Sokhadze E, Baruth J, El-Baz A, Horrell T, Sokhadze G, Carroll T, et al. Impaired error  
610 monitoring and correct function in autism. *J Neurother.* 2010;14:79–95.
- 611 27. South M, Larson MJ, Krauskopf E, Clawson A. Error processing in high-functioning  
612 Autism Spectrum Disorders. *Biol Psychol.* 2010 Oct;85(2):242–51.
- 613 28. Vlamings PHJM, Jonkman LM, Hoeksma MR, van Engeland H, Kemner C. Reduced error  
614 monitoring in children with autism spectrum disorder: an ERP study. *Eur J Neurosci.* 2008  
615 Jul 15;28(2):399–406.

- 616 29. Groen Y, Wijers AA, Mulder LJM, Waggeveld B, Minderaa RB, Althaus M. Error and  
617 feedback processing in children with ADHD and children with Autistic Spectrum Disorder:  
618 An EEG event-related potential study. *Clin Neurophysiol.* 2008 Nov;119(11):2476–93.
- 619 30. Horan WP, Foti D, Hajcak G, Wynn JK, Green MF. Impaired neural response to internal  
620 but not external feedback in schizophrenia. *Psychol Med Camb.* 2012 Aug;42(8):1637–47.
- 621 31. Larson MJ, Clayson PE, Baldwin SA. Performance monitoring following conflict: Internal  
622 adjustments in cognitive control? *Neuropsychologia.* 2012 Feb;50(3):426–33.
- 623 32. McPartland JC, Crowley MJ, Perszyk DR, Mukerji CE, Naples AJ, Wu J, et al. Preserved  
624 reward outcome processing in ASD as revealed by event-related potentials. *J Neurodev*  
625 *Disord.* 2012;4(1):16.
- 626 33. Larson MJ, Farrer TJ, Clayson PE. Cognitive control in mild traumatic brain injury:  
627 Conflict monitoring and conflict adaptation. *Int J Psychophysiol.* 2011 Oct;82(1):69–78.
- 628 34. Morris SE, Heerey EA, Gold JM, Holroyd CB. Learning-related changes in brain activity  
629 following errors and performance feedback in schizophrenia. *Schizophr Res.* 2008  
630 Feb;99(1–3):274–85.
- 631 35. Halmi KA, Bellace D, Berthod S, Ghosh S, Berrettini W, Brandt HA, et al. An examination  
632 of early childhood perfectionism across anorexia nervosa subtypes. *Int J Eat Disord.* 2012  
633 Sep;45(6):800–7.
- 634 36. Hewitt PL, Flett GL, Ediger E. Perfectionism Traits and Perfectionistic Self-Presentation in  
635 Eating Disorder Attitudes, Characteristics, and Symptoms. *Int J Eat Disord.* 1995  
636 Dec;18(4):317–26.
- 637 37. Ashby JS, Bruner LP. Multidimensional Perfectionism and Obsessive-Compulsive  
638 Behaviors. *J Coll Couns.* 2005 Spring;8(1):31–40.
- 639 38. Periasamy S, Ashby JS. Multidimensional Perfectionism and Locus of Control: Adaptive  
640 vs. Maladaptive Perfectionism. *J Coll Stud Psychother.* 2002 Dec;17(2):75.
- 641 39. Stoeber J, Otto K. Positive Conceptions of Perfectionism: Approaches, Evidence,  
642 Challenges. *Personal Soc Psychol Rev Lawrence Erlbaum Assoc.* 2006 Nov;10(4):295–  
643 319.
- 644 40. Fairburn CG, Cooper Z, Doll HA, Welch SL. Risk factors for anorexia nervosa: Three  
645 integrated case-control comparisons. 1999;56(*Arch Gen Psychiatry*):468–76.
- 646 41. Hewitt P l., Felt G l. Dimensions of perfectionism in unipolar depression. *J Abnorm*  
647 *Psychol.* 1991 Feb;100(1):98.
- 648 42. Steele A, Corsini N, Wade TD. The interaction of perfectionism, perceived weight status,  
649 and self-esteem to predict bulimic symptoms: The role of ‘benign’ perfectionism. *Behav*  
650 *Res Ther.* 2007 Jul;45(7):1647–55.

- 651 43. Ye HJ, Rice KG, Storch EA. Perfectionism and Peer Relations Among Children with  
652 Obsessive-compulsive Disorder. *Child Psychiatry Hum Dev.* 2008 Dec 1;39(4):415–26.
- 653 44. Perrone-McGovern K, Simon-Dack S, Esche A, Thomas C, Beduna K, Rider K, et al. The  
654 influence of emotional intelligence and perfectionism on Error-Related Negativity: An  
655 event related potential study. *Personal Individ Differ.* 2017 Jun;111:65–70.
- 656 45. Stahl J, Acharki M, Kresimon M, Völler F, Gibbons H. Perfect error processing:  
657 Perfectionism-related variations in action monitoring and error processing mechanisms. *Int*  
658 *J Psychophysiol.* 2015 Aug;97(2):153–62.
- 659 46. Schrijvers DL, De Bruijn ERA, Destoop M, Hulstijn W, Sabbe BGC. The impact of  
660 perfectionism and anxiety traits on action monitoring in major depressive disorder. *J Neural*  
661 *Transm.* 2010 Jul;117(7):869–80.
- 662 47. Kawamura KY, Hunt SL, Frost RO, DiBartolo PM. Perfectionism, Anxiety, and  
663 Depression: Are the Relationships Independent? *Cogn Ther Res.* 2001 Jun 1;25(3):291–  
664 301.
- 665 48. Gu R, Yu-Xia Huang, Yue-Jia Luo. Anxiety and feedback negativity. *Psychophysiology.*  
666 2010 Sep;47(5):961–7.
- 667 49. Rotter JB. Internal versus external locus of control reinforcement: A case history of a  
668 variable. *Am Psychol.* 1990;45(4):489–93.
- 669 50. Jackman LC, Thorsteinsson EB, McNeil DG. Perfect Imperfections: Locus of Control,  
670 Perfectionism, and Postpartum Depression. *SAGE Open.* 2017 Apr;7(2):215824401771068.
- 671 51. Falkenstein M, Christ S, Hohnsbein J. ERP components on reaction errors and their  
672 functional significance: a tutorial. *Biol Psychol.* 2000;87–107.
- 673 52. Nieuwenhuis S, Ridderinkhof KR, Blom J, Band GPH, Kok A. Error-related brain  
674 potentials are differentially related to awareness of response errors: Evidence from an  
675 antisaccade task. *Psychophysiology.* 2001;38(5):752–60.
- 676 53. Drizinsky J, Zülch J, Gibbons H, Stahl J. How personal standards perfectionism and  
677 evaluative concerns perfectionism affect the error positivity and post-error behavior with  
678 varying stimulus visibility. *Cogn Affect Behav Neurosci.* 2016 Oct;16(5):876–87.
- 679 54. Tops M, Koole S, Wijers A. The Pe of Perfectionism: Concern Over Mistakes Predicts the  
680 Amplitude of a Late Frontal Error Positivity. *J Psychophysiol.* 2013 Jan 1;27:84.
- 681 55. Ethridge P, Weinberg A. Psychometric properties of neural responses to monetary and  
682 social rewards across development. *Int J Psychophysiol.* 2018 Oct;132:311–22.
- 683 56. Luking KR, Nelson BD, Infantolino ZP, Sauder CL, Hajcak G. Internal Consistency of  
684 Functional Magnetic Resonance Imaging and Electroencephalography Measures of Reward



- 685 in Late Childhood and Early Adolescence. *Biol Psychiatry Cogn Neurosci Neuroimaging*.  
686 2017 Apr;2(3):289–97.
- 687 57. Meyer A, Lerner MD, Reyes ADL, Laird RD, Hajcak G. Considering ERP difference  
688 scores as individual difference measures: Issues with subtraction and alternative  
689 approaches. *Psychophysiology*. 2017 Jan 1;54(1):114–22.
- 690 58. Taylor EP, Couper R, Butler CM. Adolescent perfectionism: Structural features of the Frost  
691 Multidimensional Perfectionism Scale and correlates with attachment and psychopathology.  
692 *Psychol Psychother Theory Res Pract*. 2017 Dec;90(4):686–704.
- 693 59. Frost RO, Marten P, Lahart C, Rosenblate R. The dimensions of perfectionism. *Cogn Ther*  
694 *Res*. 1990 Oct 1;14(5):449–68.
- 695 60. Burgess AM, Frost RO, DiBartolo PM. Development and Validation of the Frost  
696 Multidimensional Perfectionism Scale–Brief. *J Psychoeduc Assess*. 2016 Oct;34(7):620–  
697 33.
- 698 61. Eriksen BA, Eriksen CW. Effects of noise letters upon the identification of a target letter in  
699 a nonsearch task. *Percept Psychophys*. 1974 Jan;16(1):143–9.
- 700 62. Dien J. The ERP PCA Toolkit: An open source program for advanced statistical analysis of  
701 event-related potential data. *J Neurosci Methods*. 2010 Mar;187(1):138–45.
- 702 63. Clayson PE, Baldwin SA, Larson MJ. How does noise affect amplitude and latency  
703 measurement of event-related potentials ( ERPs)? A methodological critique and simulation  
704 study. *Psychophysiology*. 2013 Feb;50(2):174–86.
- 705 64. Luck SJ, Gaspelin N. How to get statistically significant effects in any ERP experiment  
706 (and why you shouldn't). *Psychophysiology*. 2017 Jan;54(1):146–57.
- 707 65. Baldwin SA, Larson MJ, Clayson PE. The dependability of electrophysiological  
708 measurements of performance monitoring in a clinical sample: A generalizability and  
709 decision analysis of the ERN and Pe. *Psychophysiology*. 2015 Jun;52(6):790–800.
- 710 66. Larson MJ, South M, Krauskopf E, Clawson A, Crowley MJ. Feedback and reward  
711 processing in high-functioning autism. *Psychiatry Res*. 2011 May;187(1–2):198–203.
- 712 67. Clawson A, South M, Baldwin S, Larson M. Electrophysiological Endophenotypes and the  
713 Error-Related Negativity (ERN) in Autism Spectrum Disorder: A Family Study. *J Autism*  
714 *Dev Disord*. 2017 May;47(5):1436–52.
- 715 68. Clayson PE, Miller GA. ERP Reliability Analysis (ERA) Toolbox: An open-source toolbox  
716 for analyzing the reliability of event-related brain potentials. *Int J Psychophysiol*. 2017  
717 Jan;111:68–79.

- 718 69. Barke A, Bode S, Dechent P, Schmidt-Samoa C, Van Heer C, Stahl J. To err is (perfectly)  
719 human: behavioural and neural correlates of error processing and perfectionism. *Soc Cogn*  
720 *Affect Neurosci*. 2017 Oct;12(10):1647–57.
- 721 70. Pieters GLM, de Bruijn ERA, Maas Y, Hulstijn W, Vandereycken W, Peuskens J, et al.  
722 Action monitoring and perfectionism in anorexia nervosa. *Brain Cogn*. 2007 Feb;63(1):42–  
723 50.
- 724 71. Rotter JB. Some problems and misconceptions related to the construct of internal versus  
725 external control of reinforcement. *J Consult Clin Psychol*. 1975;43(1):56–67.
- 726 72. Galvin BM, Randel AE, Collins BJ, Johnson RE. Changing the focus of locus (of control):  
727 A targeted review of the locus of control literature and agenda for future research. *J Organ*  
728 *Behav*. 2018;39(7):820–33.
- 729 73. Shafran R, Mansell, W. Perfectionism and psychopathology: A review of the research and  
730 treatment. *Clin Psychol Rev*. 2001;21:879–906.
- 731

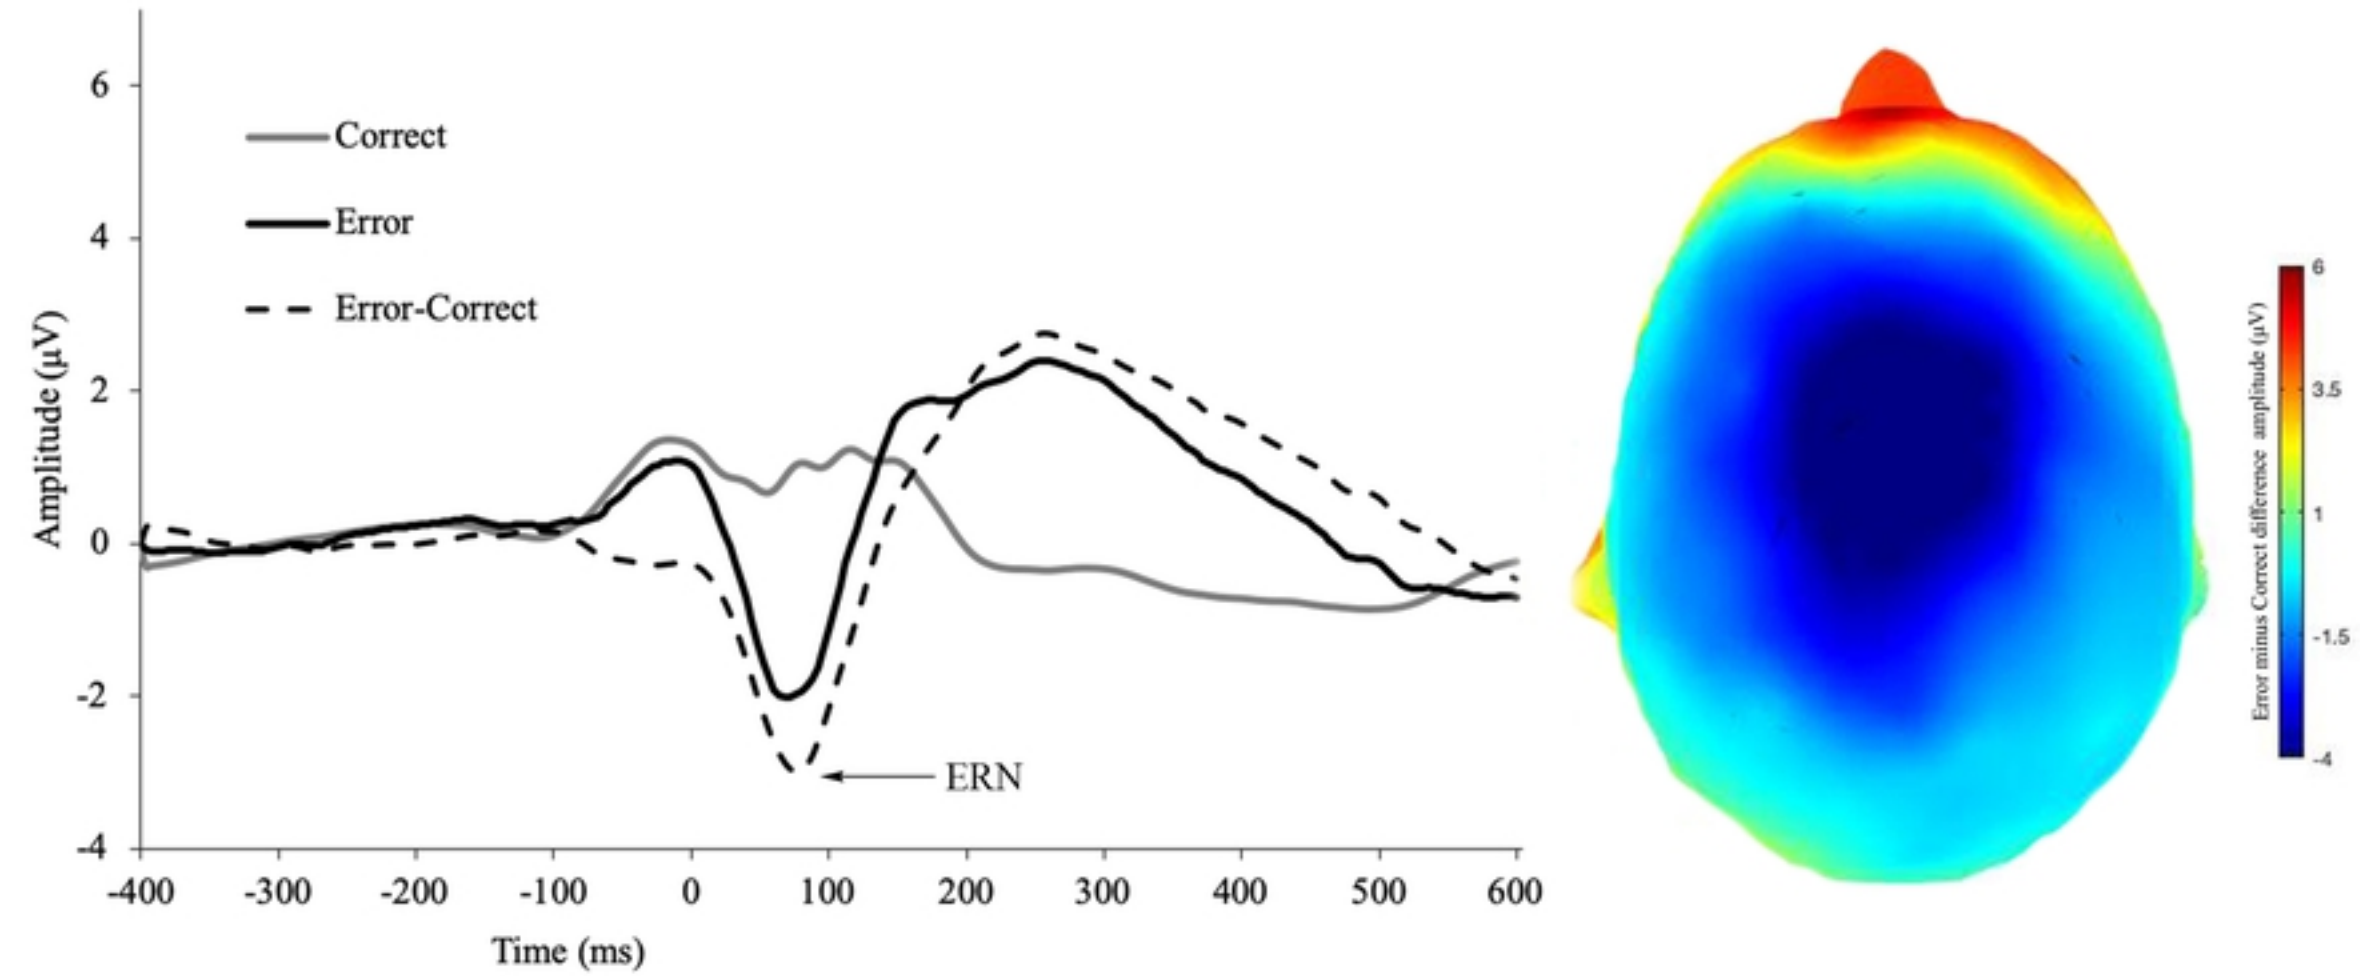

Figure

**ERN Difference by Frost Total**

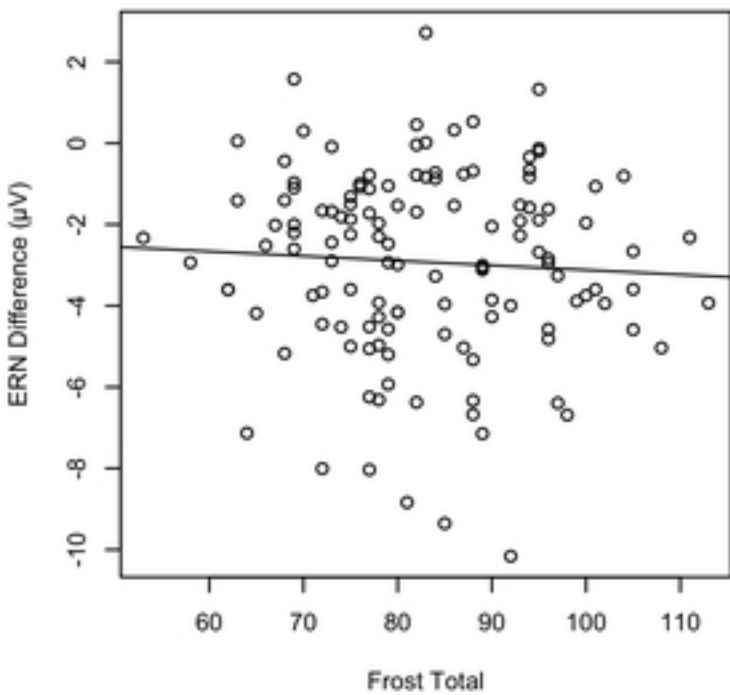

**ERN Difference by Rotter Total**

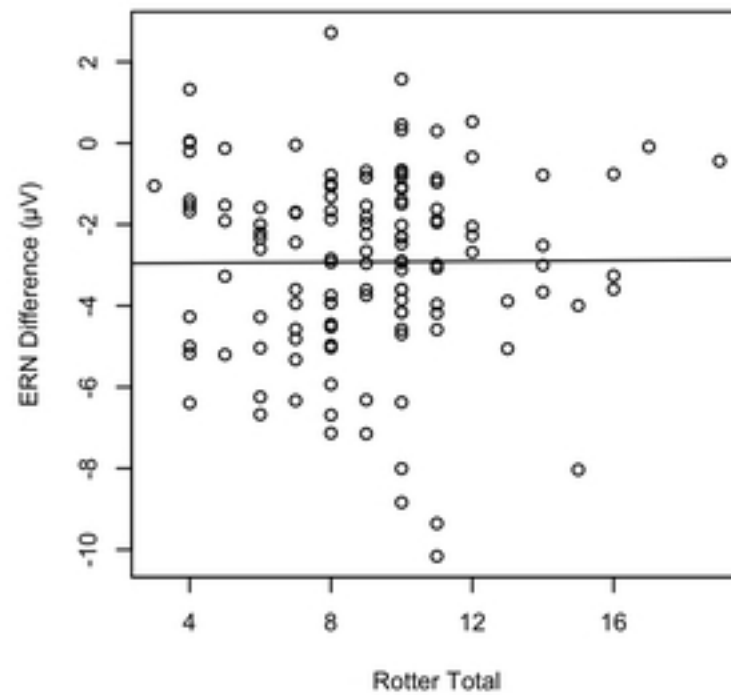

**ERN Difference by Levenson Total**

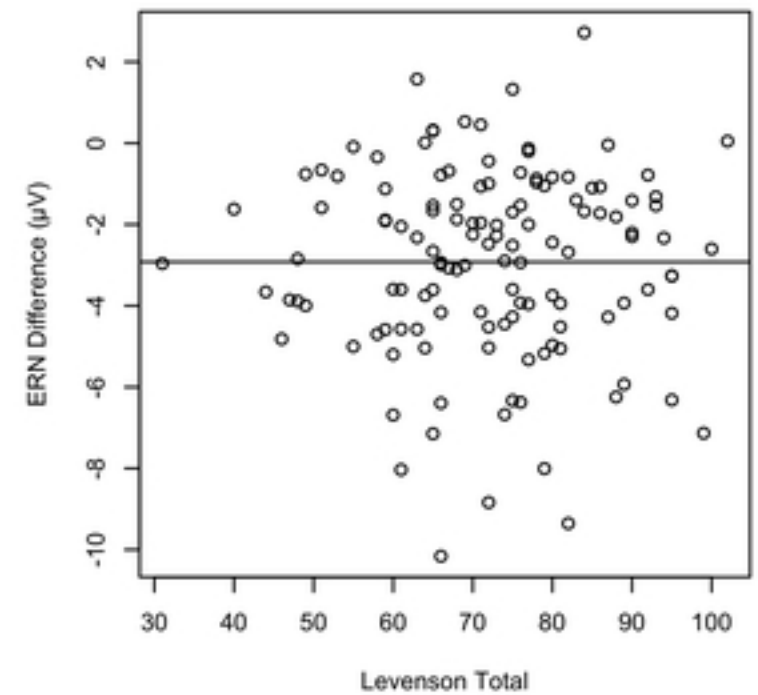

**RewP Difference by Frost Total**

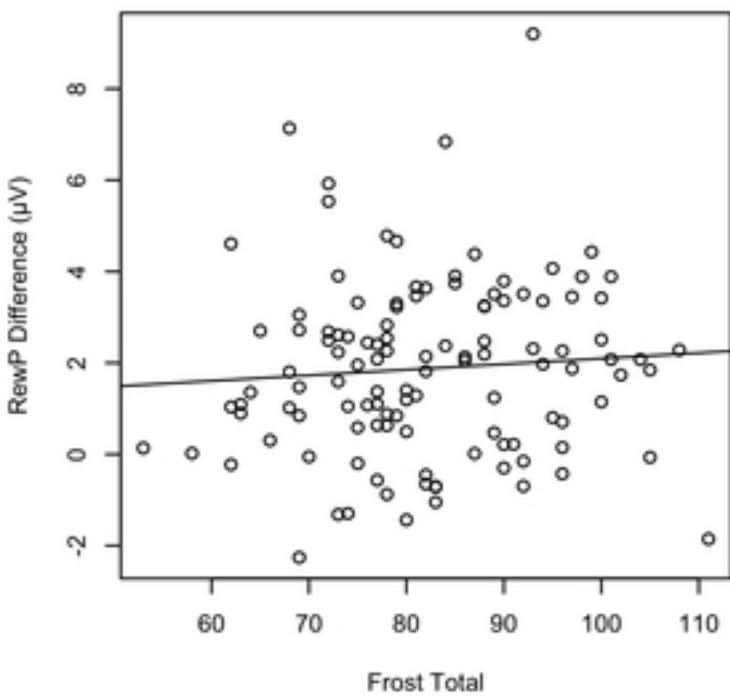

**RewP Difference by Rotter Total**

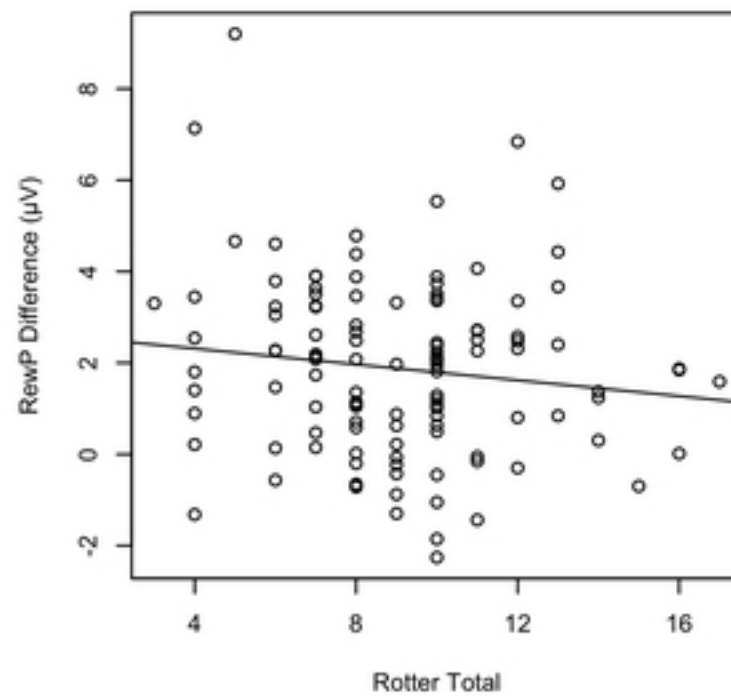

**RewP Difference by Levenson Total**

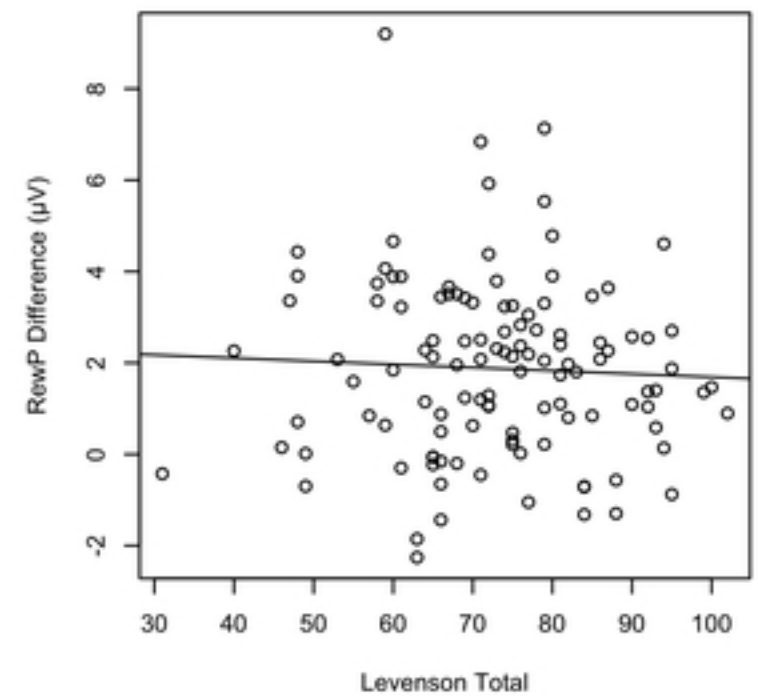

**Figure**

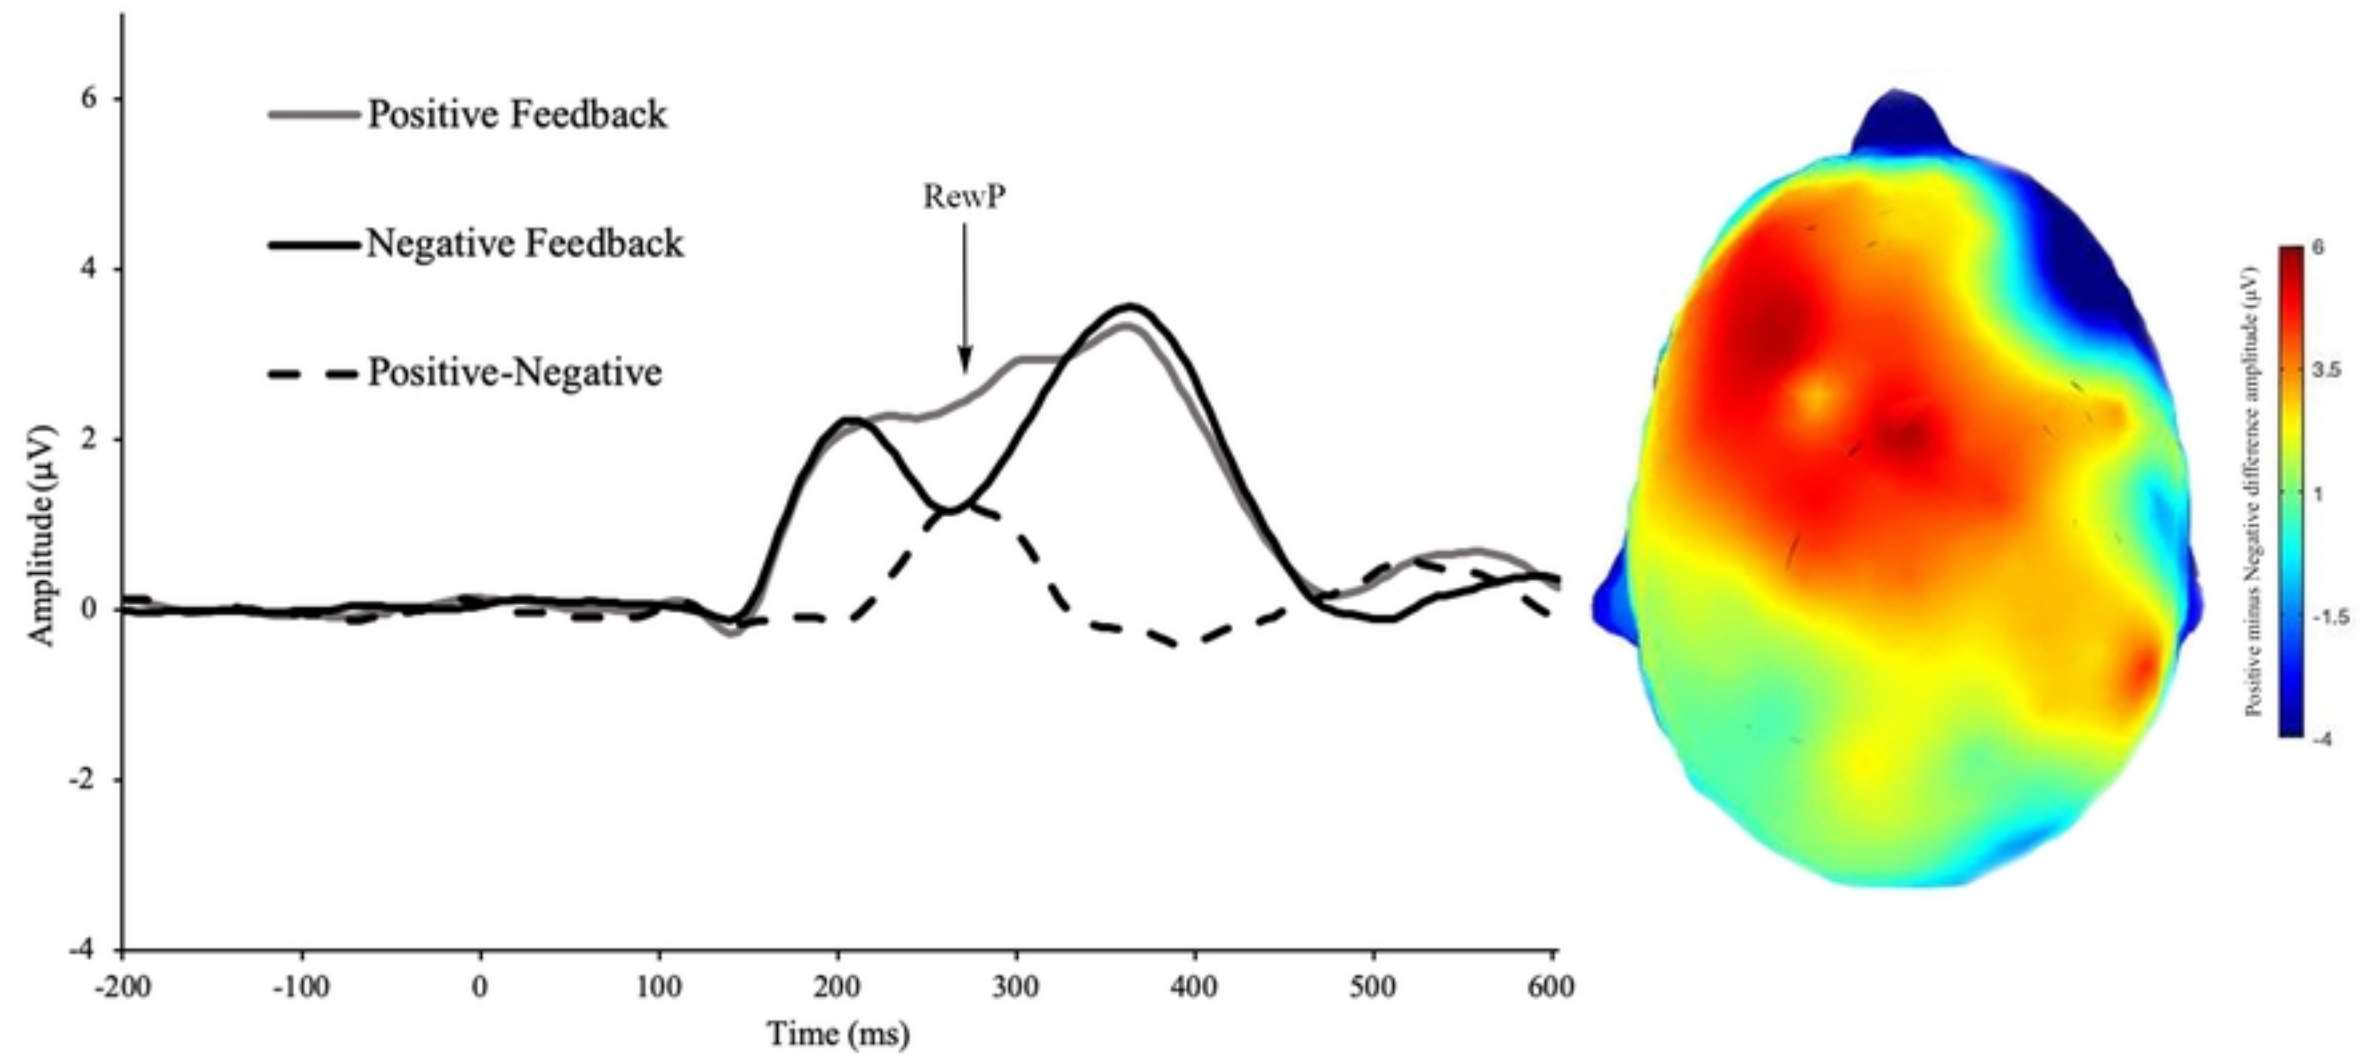

Figure

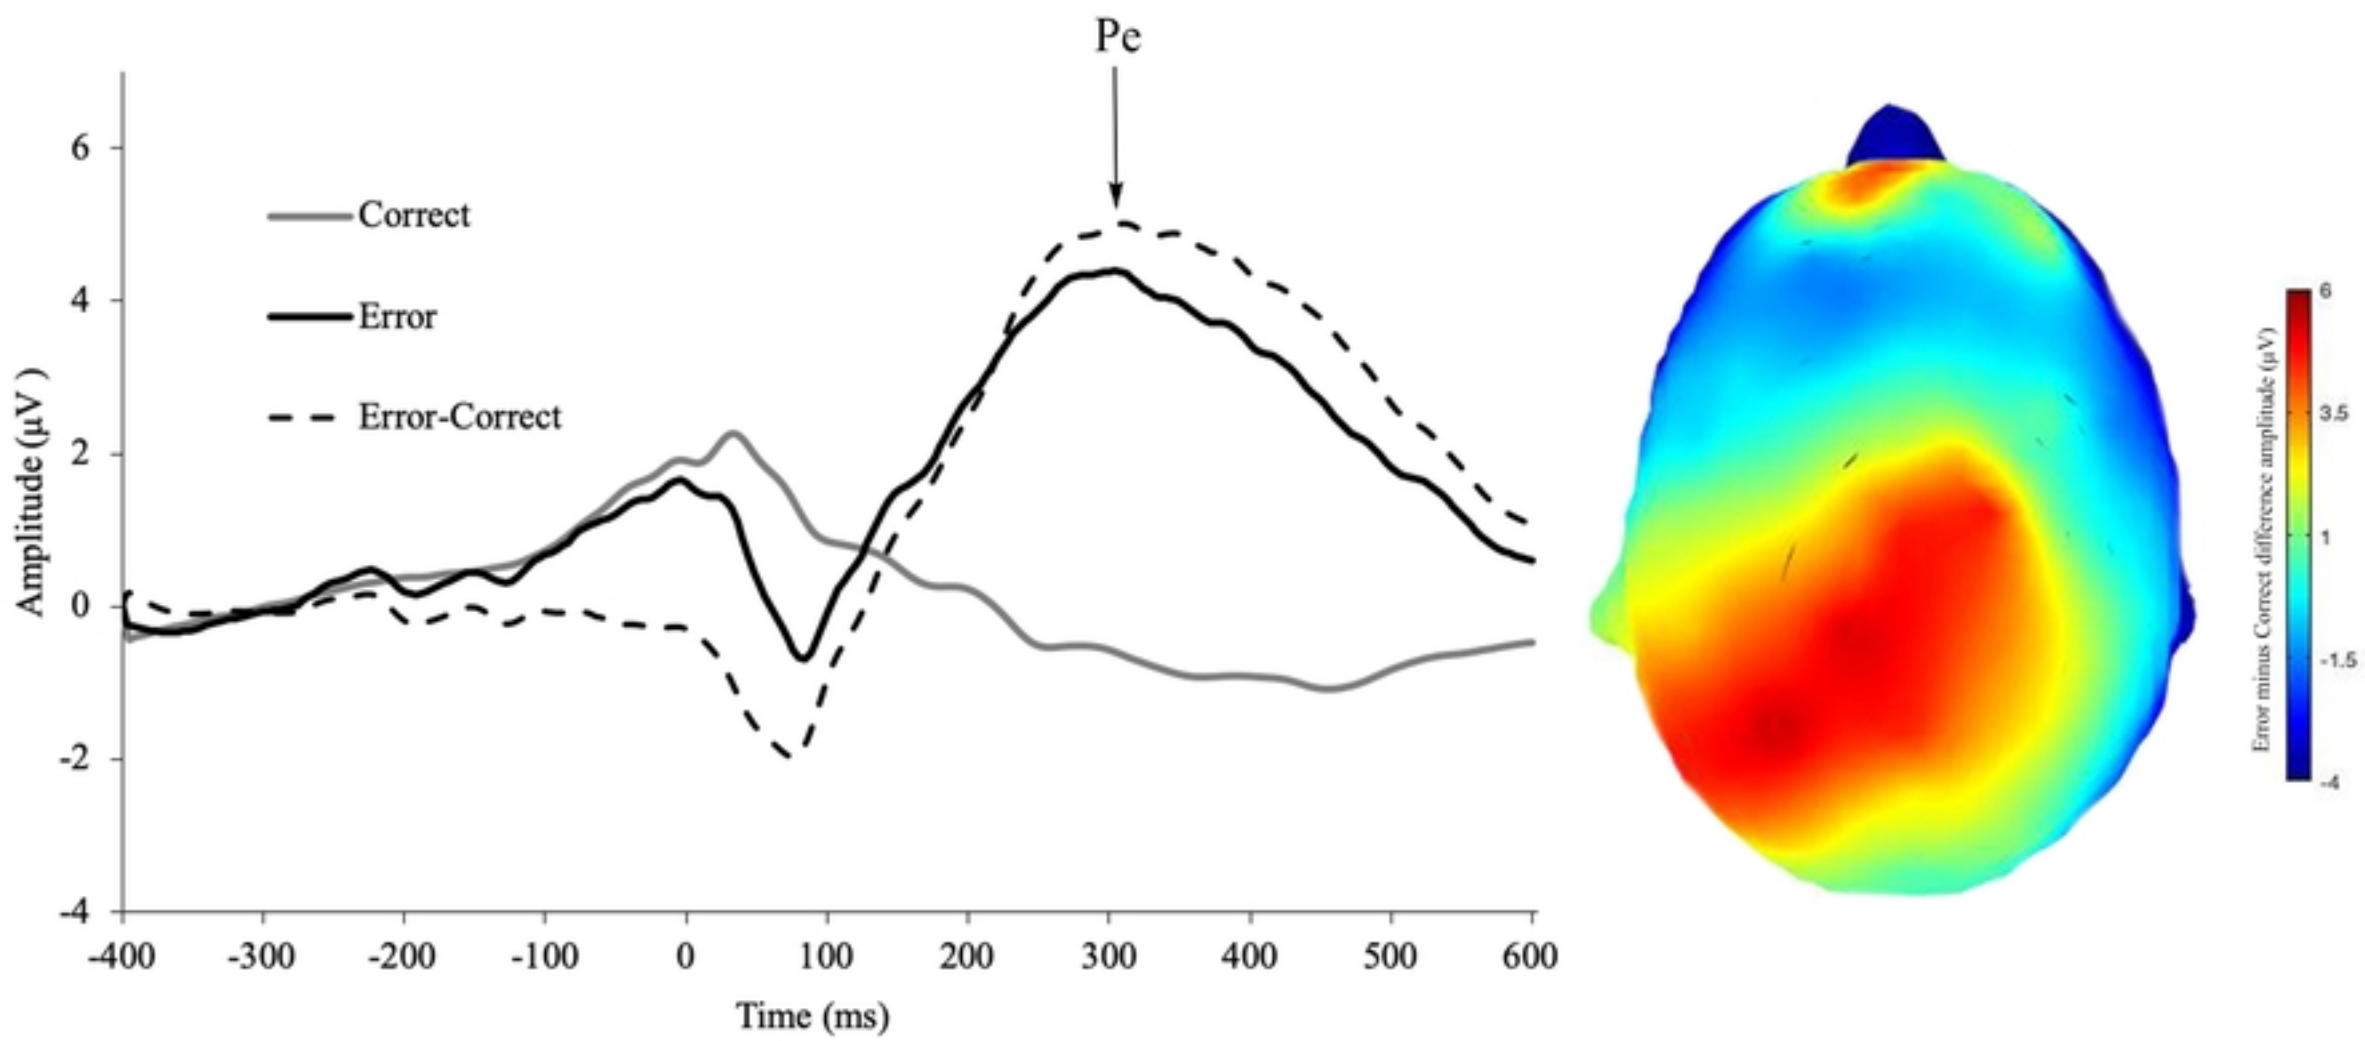

Figure
